# 1 **Digital Screener of Socio-Motor Agency Balancing Autonomy and** 2 **Control**

3 **Theodoros Bermperidis<sup>1</sup>, Richa Rai<sup>2</sup>, Elizabeth B Torres<sup>1,2,3\*</sup>**

4 <sup>1</sup>Sensory Motor Integration Lab, Psychology Department, Rutgers University, Piscataway, NJ USA

5 <sup>2</sup>Rutgers University Center for Cognitive Science, Piscataway, NJ, USA

6 <sup>3</sup>Rutgers University Center for Biomedicine Imaging and Modelling, Computer Science Department,  
7 Piscataway, NJ, USA

8 **\* Correspondence:**

9 Elizabeth B Torres

10 ebtorres@psych.rutgers.edu

11 **Keywords: autism, socio-motor agency, autonomy, control, entropy, stochastic analyses, signal-**  
12 **to-noise ratio, wearables, ADOS**

## 13 **Abstract**

14 Dyadic social interactions evoke complex dynamics between two agents that while exchanging unequal  
15 levels of body autonomy and motor control, may find a fine balance to take turns and gradually build  
16 social rapport. To study the evolution of such complex interactions, we currently rely exclusively on  
17 subjective pencil and paper means. Here we complement this approach with objective biometrics of  
18 socio-motor behaviors conducive of socio-motor agency. Using a common clinical test as the backdrop  
19 of our study to probe social interactions between a child and a clinician, we demonstrate new ways to  
20 streamline the detection of social readiness potential in both typically developing and autistic children.  
21 We highlight differences between males and females and uncover a new data type amenable to  
22 generalize our results to any social settings. The new methods convert dyadic bodily biorhythmic  
23 activity into spike trains and demonstrates that in the context of dyadic behavioral analyses, they are  
24 well characterized by a continuous gamma process independent from corresponding binary spike rates.  
25 We offer a new framework that combines stochastic analyses, nonlinear dynamics, and information  
26 theory, to facilitate scaling the screening and tracking of social interactions with applications to autism.

27

## 28 **1 Introduction**

29 All research involving autism is (arguably) fundamentally tied to the Autism Diagnosis Observation  
30 Schedule (ADOS, currently in version 2 [1; 2; 3; 4].) Research spanning disparate fields, from  
31 genomics to complex social interactions relies on this test as the gold standard to classify humans  
32 across the lifespan as autistic or autism spectrum. Although clinically validated, the ADOS-based  
33 diagnosis misses females [5; 6; 7]. Moreover, there are not enough raters to absorb the large number  
34 of toddlers, children, and adults that according to various screening tools, are suspected as autistic  
35 today. The test is long and taxing on both the child and the clinician administering it because it has an  
36 average of 27 tasks aimed at engaging the child through social presses and expecting overtures from  
37 the child.

38

39 The ADOS is a dynamic and flexible test in the sense that the clinician can choose the tasks according  
40 to the flow of the child's performance. It also adapts the test on demand, choosing the module that best  
41 agrees with the child's communication level. However, the interaction occurs while the clinician also  
42 scores the child's performance. Though valid to probe social competence, many of the tasks artificially  
43 rob the child of a chance to be naturally social, as the interaction is also taxing on the clinician and at  
44 times, awkward and seemingly forced. In this sense, several of the tasks might be biased, interfering  
45 with the child's agency, and robbing the clinician of the spontaneity characteristic of a natural social  
46 exchange. In this sense, we need objective ways to quantify this potential bias that such a taxing effect  
47 may produce on both social agents.

48

49 Prior work analyzing thousands of ADOS score records found non-obvious issues with the statistical  
50 foundations used to validate this test. While there are theoretical requirements of normality and  
51 homogeneous variance in the signal detection theory used to validate the ADOS [8; 9], as these  
52 assumptions are required for independence between bias and sensitivity [10], the empirical data across  
53 thousands of records, violate these assumptions [10]. New methods have then been proposed to help  
54 reduce the number of tasks [11], while also utilizing motor signatures to identify females [4; 11; 12;  
55 13]. However, there are no means to define naturalistic social agency in the dyad and to identify tasks  
56 that enhance it. Furthermore, no means to implement these tasks using artificial intelligence (AI) and  
57 machine learning (ML) methods have been proposed. Such approaches would help us speed up,  
58 automate, and scale the assessment process, particularly doing so with respect to currently  
59 underdiagnosed females [5].

60

61 We reasoned in the present work that the digital ADOS [11], *i.e.*, the ADOS that is digitally recorded  
62 while the child and clinician interact, could leverage the validity of this test as the gold standard for  
63 clinical and research use, while providing a streamlined version of it that could help us (1) identify  
64 objective biometrics of social agency and (2) automate the process of identifying socially compliant  
65 tasks using methods from Artificial Intelligence (AI) and Machine Learning (ML).

66

67 In our approach, socially compliant tasks are those which provide social agency to the child that is  
68 being diagnosed. More precisely, we here define social agency as the balance between autonomy and  
69 control during a social exchange. Autonomy is defined as the ability of the child to lead the  
70 conversation as much as the clinician does, rather than always following the lead of the clinician.  
71 Control is defined as the ability of the child to effectively predict the consequences of impending social  
72 actions and overall behaviors, based on intact motor control. Both concepts are illustrated in Figure 1.

73

74

75

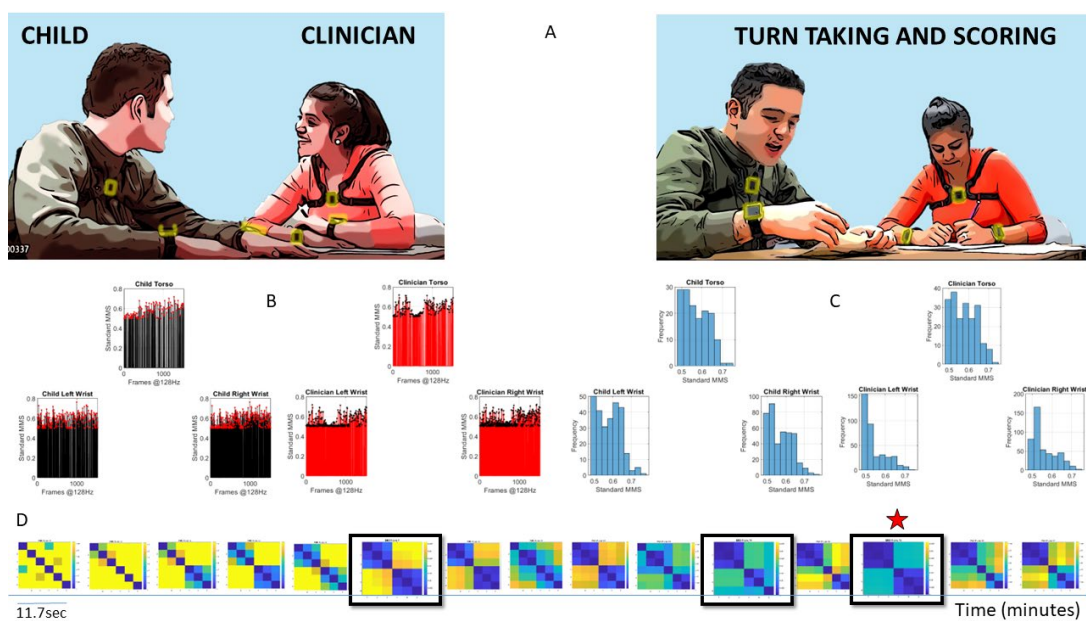

76

77 **Figure 1. Digitally characterizing rapport and turn taking during an ADOS-based social**  
 78 **interaction. (A) Snapshots of the interaction between a child and clinician wearing 6 biosensors,**  
 79 **3 on each body, synchronously registering motion at 128Hz. Clinician-led interaction and note**  
 80 **taking while rating the interaction. (B) Sample standardized micromovement spikes (MMS)**  
 81 **derived from angular speed capturing approximately 11.7seconds of social exchange. (C)**  
 82 **Frequency histograms of the MMS peaks, (one frame) from each sensor on the child and**  
 83 **clinician. (D) Pairwise comparison of the histograms evolution using the Earth Movers' distance**  
 84 **similarity metric. Entries reflect the 6x6 matrix (child and clinician, 3 sensors at the torso, right**  
 85 **and left wrist) as in (A). Off diagonal entries are the shared dyadic space, while entries next to**  
 86 **the diagonal are the child's or clinician's activities in standalone mode. Blue to yellow EMD**  
 87 **scale ranks from most to least similar spike patterns. Star marks the maximal similarity.**

88

89 Socio-motor agency can be impeded if neurodevelopment undergoes a different maturation path [3;  
 90 14; 15]. If the child, for example, has excessive motor noise and motor randomness in its performance,  
 91 the predictive ability required for self-motor control will be compromised [3] and with it, the overall  
 92 control ability will be altered. This alteration will also in turn affect the clinician's perception of the  
 93 child's nuanced micro-motions underlying social behaviors, thus biasing the assessment [3; 11; 14].  
 94 Under such circumstances, socio-motor agency can be impeded, as can be the rating of the child by the  
 95 clinician. Therefore, the tasks that manifest excess random noise of the joint dyadic motor patterns  
 96 (lower control of the dyad) and / or excess lead of the clinician within the dyad (lower autonomy of the  
 97 child), are inevitably bound to bias the clinician's scoring towards a deficit model of autism. In contrast,  
 98 the tasks that manifest high dyadic control and autonomy of the child are bound to boast social agency,  
 99 according to our biometric definition. These tasks can provide a more appropriate model of readiness  
 100 potential for social exchange. While detecting a problem relative to normative data, this new model  
 101 can also do so in a fair, unbiased manner. In this sense, the child has a chance to succeed. In turn, the  
 102 clinician can presume competence and identify areas of strength to recommend treatments more  
 103 appropriately. Such treatments will rather be grounded on the non-obvious, nuanced aspects of  
 104 behaviors occurring at a micro-level that escapes the naked eye. Yet they will be quantifiable with  
 105 biosensors that read out biorhythmic activities from the nervous systems with sub-second resolution.

106 We here introduce a theoretical framework grounded on empirically derived power (scaling) laws of  
107 human ontogenetically orderly (neurodevelopmental) maturation. This framework connects stochastic  
108 analysis of human biorhythmic (time series) data with information theoretical metrics. We define new  
109 truly personalized computational indexes of dyadic control, autonomy, and socio-motor agency from  
110 biosensors' digital data using as guidance the digitized ADOS-2. Then, we identify socially compliant  
111 tasks *i.e.*, ADOS-2 tasks with balanced socio-motor agency, thus streamlining the digital ADOS-2.  
112 Lastly, we propose new ways to help automate and speed up autism screening and detection based on  
113 these socially appropriate tasks identified from the motor variability of the interactive dyad, rather than  
114 from the child's or the clinician's performance alone.

115

## 116 2 Methods and Analyses

### 117 2.1 Participants

118 A total of 29 children including 19 males and 10 females spanning 4-15 years of age and two adult  
119 clinicians participated in the study (See Table 1). Children participated in multiple sessions over the  
120 span of 2 ½ years with one clinician per session and were administered a specific module per session,  
121 *i.e.*, a specific subset of ADOS tasks, in accordance with their age, level of development and spoken  
122 language.

123 Table 1. Participants information.

| Record Number | Participant ID | Age     | Sex | Visit 1 Module (Total Score) | Visit 2 Module (Total Score) | Visit 3 Module (Total Score) | Visit 4 Module (Total Score) |
|---------------|----------------|---------|-----|------------------------------|------------------------------|------------------------------|------------------------------|
| 1             | NT01           | (7-9)   | F   | 3(0)                         | -                            | -                            | -                            |
| 2             | NT02           | (10-12) | F   | 3(0)                         | -                            | -                            | -                            |
| 3             | NT03           | (7-9)   | F   | 3(2)                         | -                            | -                            | -                            |
| 4             | NT04           | (10-12) | F   | 3(2)                         | -                            | -                            | -                            |
| 5             | NT06           | (7-9)   | M   | 3(2)                         | -                            | -                            | -                            |
| 6             | NT08           | (7-9)   | F   | 3(0)                         | -                            | -                            | -                            |
| 7             | NT09           | (7-9)   | F   | 3(1)                         | -                            | -                            | -                            |
| 8             | NT10           | (10-12) | M   | 3(1)                         | -                            | -                            | -                            |
| 9             | NT11           | (13-15) | M   | 4(2)                         | -                            | -                            | -                            |
| 10            | NT12           | (10-12) | F   | 4(1)                         | -                            | -                            | -                            |

|    |      |         |   |          |          |          |           |
|----|------|---------|---|----------|----------|----------|-----------|
| 11 | NT13 | (13-15) | M | 4(0)     | -        | -        | -         |
| 12 | EP01 | (4-6)   | M | 3(10)    | 2(7)     | 3(9)     | 2(8)*x    |
| 13 | EP02 | (7-9)   | M | 3(9)     | 2(8) *X  | -        | -         |
| 14 | EP03 | (10-12) | M | 3(12)    | 2(13)    | 3(24) *X | 2(21) *X  |
| 15 | EP04 | (13-15) | F | 3(7)     | 4(8) *X  | 3(11) *X | 4(8) *X   |
| 16 | EP05 | (4-6)   | M | 3(9)     | 2(7)     | 3(8) *X  | -         |
| 17 | EP07 | (10-12) | M | 3(12)    | 2(9) *X  | 3(18) *X | 2(13) *X  |
| 18 | EP09 | (4-6)   | M | 1(18) *X | 1(16)    | -        | -         |
| 19 | EP10 | (7-9)   | M | 1(13)    | 1(17)    | -        | -         |
| 20 | EP13 | (4-6)   | M | 3(17)    | -        | -        | -         |
| 21 | EP14 | (13-15) | M | 1(8)     | 2(10)    | 1(14)    | 2(15) *X  |
| 22 | EP15 | (10-12) | M | 1(17)    | 1(15) *X | 1(26)    | 1(21) *X  |
| 23 | EP16 | (4-6)   | M | 3(11)    | 2(11)    | 3(22) *X | 2(20) *X  |
| 24 | EP17 | (10-12) | M | 1(16)    | 1(18) *X | 1(18)    | 1(19) *X  |
| 25 | EP18 | (7-9)   | F | 3(10)    | 2(11)    | 3(16)    | 2(10)     |
| 26 | EP19 | (7-9)   | M | 3(8) *X  | 2(8) *X  | 3(8)     | -         |
| 27 | EP20 | (7-9)   | M | 3(11)    | 2(11) *X | 3(17) *X | 2(16) *X  |
| 28 | EP21 | (10-12) | F | 3(11)    | 2(9) *X  | 3(8) *X  | 2(11) *11 |
| 29 | EP22 | (4-6)   | M | 1(26)    | 1(24) *X | -        | -         |

124 \*X Denotes that the participant came for the visit, but his/her data could not be used either because it  
 125 was not available/lost/corrupted or the information available was incomplete. NT stands for  
 126 neurotypical participant and EP stands for expected-asd participant. The latter were confirmed by the  
 127 clinician to have an ASD diagnosis at the end of the session. **The identifiers EP/NT are not known**  
 128 **to the clinicians or parents and are used as a way to number the participants internally in our**  
 129 **lab.**

130

## 131 2.2 Raw Data Acquisition

132 Digital data were acquired during each session using light wearable sensors (APDM Opals, Portland,  
133 OR, USA). Six sensors were used, two on the left and right wrist and one on the torso, both on the  
134 child and clinician. The sensors continuously and synchronously recorded triaxial accelerometry and  
135 gyroscopic data at a sampling frequency of 128 Hz. The recording environment followed the  
136 standardized ADOS requirements using similar table and sitting arrangements for the clinician-child  
137 dyad. The two clinicians were unaware of the goals of the study.

## 138 2.3 Data Type: The Micro-Movement Spikes Derivation

139 Scalar values of angular speed from orientation data that the gyroscopes recorded (or acceleration from  
140 the inertial measurement units) were acquired using the Euclidean norm (using Equation 2.1) of the  
141 coordinate components of motion as measured by the sensors:

$$142 \quad V = \sqrt{V_x^2 + V_y^2 + V_z^2} \quad \text{Equation (2.1)}$$

143 From here onward, all analyses refer to the scalar value  $V$ , the angular speed in deg/sec.

144 Human motion data such as angular speed and acceleration, are inherently biased by allometric effects  
145 and anatomical differences across subjects. To scale out such artifacts, we normalize motion data  
146 fluctuations (peaks and valleys) (using Equation 2.2) as relative deviations from the empirically  
147 estimated Gamma mean. The mean is estimated by fitting the continuous Gamma family of  
148 distributions to the raw peak data. The Gamma family of distributions has been consistently found to  
149 be the best candidate to fit human peak activity motion data, according to Maximum Likelihood  
150 Estimation (MLE). After we shift and center our data around the Gamma mean, we scale and map peak  
151 motion activity to the  $[0,1]$  interval according to the local minima average:

$$152 \quad \text{NormPeak} = \frac{\text{Peak}}{\text{Peak} + \text{Avg}_{\text{min to min}}} \quad \text{Equation (2.2)}$$

153 The normalized peak series, called Micro Movements Spikes (MMS)<sup>TM</sup> conserve the temporal  
154 structure of the original speed/acceleration time series. They represent “quiet” times interspersed with  
155 bouts of activity away from mean activity.

## 156 2.4 The Gamma Process of the MMS

157 The normalized speed MMS are best fit (in the MLE sense) by the continuous Gamma family of  
158 probability distributions [3; 16]. Furthermore, the parameters of the Gamma distribution, shape  $k$  and  
159 scale  $\theta$  have been found across multiple studies from our laboratory, including the present one (see  
160 Results), to follow a Power Law of the form described in Equation 2.3:

161

$$162 \quad k \cong a\theta^b \rightarrow \log(k) = a + b \log(\theta) + \varepsilon \quad \text{Equation (2.3)}$$

163

164 Where  $\varepsilon$  is a small error term and  $b < 0$ . This Power Law for the standardized MMS time series reveals  
165 a maturation process of the motor code for voluntary [3; 17] and involuntary [18] motions. This law is

166 very important because it provides us with a quantitative framework to interpret fluctuations in  
167 biorhythmic data that range from random to predictive.

168

169 Importantly, the continuous Gamma family of probability distributions has the first (mean) and second  
170 (variance) moments expressed in terms of the shape and scale described by Equations 2.4)

171

$$172 \quad \mu = k\theta, \sigma^2 = k\theta^2 \quad \text{Equation (2.4)}$$

173

174 Then, using Equations 2.4, the Noise-to-Signal Ratio (NSR) of the MMS reduces to the Gamma scale  
175 parameter as in Equation 2.5:

$$176 \quad NSR = \frac{\sigma^2}{\mu} = \frac{k\theta^2}{k\theta} = \theta \quad \text{Equation (2.5)}$$

177

178 The Gamma scale parameter in Equation 2.5 fully characterizes the noise of the motor patterns of the  
179 interactive dyad (or of the participant), *i.e.*, in relation to the level of fluctuations of angular speed  
180 during the ADOS activities.

181

182 Empirical estimation of these parameters in thousands of participants over a decade of work with  
183 humans along the lifespan, and across disorders of the nervous system, has revealed an interpretation  
184 for the Gamma log-log parameter plane. Distributions that fall along high NSR regimes are also close  
185 to the memoryless random regime of the special exponential distribution case (when  $k = 1$ ). Points in  
186 mid NSR correspond to heavy-tailed Gamma distributions. Then, low NSR (or high signal =  $1/NSR$ )  
187 are congruent with symmetric shapes (Gaussian-like) distributions. High-signal Gaussian regimens are  
188 highly predictable in contrast to High-noise memoryless random Exponential regimes. As such, this  
189 parameter plane is empirically interpretable.

190

## 191 **2.5 Quantifying Motor Control from the Perspective of an Agent**

192 Noise-to-Signal Ratio measures the degree of motion variability away from mean activity. Small NSR  
193 characterizes steady and smooth motion, akin of goal-oriented behavior, as experienced from the  
194 perspective of the agent/ child. On the other hand, a high NSR indicates unpredictable and random  
195 motion. In that sense, the NSR is a proxy for motor control and quantifies the existence of predictable  
196 motor patterns. Because the NSR is calculated on the standardized MMS, motor noise does not depend  
197 on the anatomy of the individual as it is scaled by the mean amplitude of motion.

198

## 199 **2.6 An Information Theoretic Approach to the Analyses of the MMS**

200 The presence of MMS peaks indicates an outburst of activity away from baseline. This is informative  
201 of a motor activity. When we also consider the temporal distribution of MMS peaks, a train of such  
202 spikes can be viewed as a representation of information regarding human motion variability through  
203 time. When we consider multiple sensors sampling in synchrony, the MMS spikes carry spatiotemporal  
204 information about the bursts of distributed bodily activity in the motor system.

## 205 **2.7 Binary Trains of MMS**

206 If we transform the MMS data so that the presence of a peak corresponds to the binary “1” and an  
207 absence of a peak corresponds to the binary “0”, we can represent normalized speed (or acceleration)  
208 as a stochastic binary sequence. An underlying mechanism stochastically generates bursts of activity,  
209 and this is equivalent to randomly generating 0s and 1s from an underlying binary alphabet as in  
210 Equation 2.6.

211

$$212 \quad B_t = 1, \text{ if } \text{NormPeak}_t > \text{threshold} \quad \text{Equation (2.6)}$$

213

214 Let’s assume that  $B_t$  is a random sample drawn from an underlying probability distribution at time  $t$ .

215

$$216 \quad B_t = 1 \text{ with probability } p_t, 0 \text{ with probability } 1 - p_t \quad \text{Equation (2.7)}$$

217

218 Entropy  $H$  in Equation 2.8 is an information theoretic measure that quantifies the amount of  
219 information in a random variable that follows a probability distribution  $P_x$  [19] and is equal to:

220

$$221 \quad H = -\sum_x p_x \log_a p_x \quad \text{Equation (2.8)}$$

222

223 In the case of the binary process, the amount of information of the random variable of an activity  
224 outburst (MMS) is given in Equation 2.9:

225

$$226 \quad H_t = -p_t \log_a(p_t) - (1 - p_t) \log_a(1 - p_t) \quad \text{Equation (2.9)}$$

227

228 Which takes the maximum value of 1 when  $p_t = 0.5$  and the minimum value of 0, when  $p_t = 0$  or 1.  
229 Intuitively, entropy measures either the uncertainty regarding the outcome of a random realization of  
230 the random variable before that variable is measured or equivalently, the amount of information we get  
231 when we observe the variable. If we know for examples, that with a 100 % chance  $B_t = 1$ , the entropy  
232 is zero as we have no uncertainty about the outcome of the measurement, and no valuable information



233 is provided to us. However, if with a 50 % chance  $B_t = 1$ , the entropy is at its maximum because we  
234 are totally uncertain whether the outcome will be 0 or 1 and observing the outcome gives us maximal  
235 information, specifically, 1 bit of information in the case of a base 2 logarithm ( $a = 2$ ).

236

## 237 **2.8 Measuring Randomness vs. Predictability Using Entropy Rate**

238 The definition of entropy can be generalized for the case of multiple random variables  $X_1, X_2, \dots, X_N$ ,  
239 as in equation 2.10, by considering the joint probability distribution  $P_{X_1, X_2, \dots, X_N}$ :

240

$$241 \quad H(X_1, X_2, \dots, X_N) = - \sum_{X_1, X_2, \dots, X_N} P_{X_1, X_2, \dots, X_N} \log_a(P_{X_1, X_2, \dots, X_N}) \quad \text{Equation (2.10)}$$

242

243 In the case of a stationary stochastic process  $X$  (*i.e.*, statistical properties preserved over time) which  
244 takes values from a discrete alphabet  $K$  (in the case of the binary MMS), we can define the entropy  
245 rate of the process as in Equation 2.11:

246

$$247 \quad H(X) = \frac{1}{T} \lim_{T \rightarrow \infty} H(X_1, X_2, \dots, X_T) \quad \text{Equation (2.11)}$$

248

249 This quantity measures how much the process changes over time, *i.e.*, the information that is carried  
250 in a new value. It measures the degree of randomness (unpredictability) of the underlying dynamical  
251 system [19; 20; 21; 22].

252

## 253 **2.9 Randomness for Dynamical Systems**

254 The concept of entropy rate is not limited to random processes, but it can also be defined in the case of  
255 deterministic dynamical systems. Let  $x_t$  be a continuous univariate times series. Then we can construct  
256 a state-space representation of the process as in Equation 2.12, if we choose an appropriate dimension  
257  $d$  of the presumed underlying dynamical system and an embedding delay  $\tau$  [23; 24].

258

$$259 \quad X_t = \begin{pmatrix} x_1 \\ x_2 \\ \vdots \\ x_d \end{pmatrix}_t = \begin{pmatrix} x(t) \\ x(t + \tau) \\ \vdots \\ x(t + (d - 1)\tau) \end{pmatrix} \quad \text{Equation (2.12)}$$

260 The existence and calculations of the embedding dimension and delay are ensured by Taken's  
 261 embedding theorem [25]. For more information on dynamical systems theory see *e.g.*, [26; 27].  
 262 Essentially, any univariate time series can be viewed as being sampled from a high dimensional  
 263 dynamical system [28]. The dynamical system follows a trajectory in the  $d$ -dimensional space defined  
 264 by the  $d$  degrees of freedom. All possible states of the dynamical system define the phase space of the  
 265 system.

266

267 If we partition the phase space across  $F$  dimensions, with  $F \leq d$ , we have an  $F$ -dimensional grid of  
 268 cells of volume  $r^F$ . Then, we can measure the state of the system at constant time intervals equal to the  
 269 embedding delay  $\tau$ . Then we can define the joint probability  $p(i_1, i_2, \dots, i_d)$  that  $X_\tau$  is in cell  $i_1$ ,  $X_{2\tau}$   
 270 is in cell  $i_2, \dots, X_{d\tau}$  is in cell  $i_d$ . The degree of "randomness" of the deterministic system can then be  
 271 calculated using the Kolmogorov-Sinai (KS) entropy[29] using Equation 2.13:

272

$$273 \quad KS = - \lim_{\tau \rightarrow 0} \lim_{r \rightarrow 0} \lim_{d \rightarrow \infty} \frac{1}{d\tau} \sum_{i_1, i_2, \dots, i_d} p(i_1, i_2, \dots, i_d) \log_a p(i_1, i_2, \dots, i_d) \quad \text{Equation (2.13)}$$

274

275 The KS entropy is almost always equal to the entropy rate of the original signal  $x_t$  and characterizes  
 276 the degree of randomness of the system (and subsequently the sampled one-dimensional signal). For  
 277 completely deterministic systems it is equal to zero and it is infinite for random systems.

278 In practice, the entropy rate is approximated using what is known as the correlation integral [30] in  
 279 Equation 2.14:

280

$$281 \quad C_d(r) = \lim_{N \rightarrow \infty} \frac{1}{N^2} [\#(n, m), (\sum_{i=1}^d |X_{n+i} - X_{m+i}|^2)^{\frac{1}{2}} \leq r] \quad \text{Equation (2.14)}$$

282

283 *i.e.*, the (#) number of pairs of trajectory points that are close to each within a tolerance threshold  $r$  and  
 284 measures the regularity (frequency) of patterns like a given template of specific length.

285 It can be shown that:

286

$$287 \quad \lim_{d \rightarrow \infty, r \rightarrow 0} \frac{1}{\tau} \log_a \frac{C_d(r)}{C_{d+1}(r)} \sim K_2$$

288

289 Where  $K_2$  is the Renyi entropy of order 2. The Renyi entropy  $K_a$  in Equation 2.15 is a generalized  
 290 form of the usual Shannon entropy and is defined as:

$$291 \quad K_a = \frac{1}{1-a} \log_a (\sum_x p_x^a) \quad \text{Equation (2.15)}$$

292 We leverage these tools to calculate the entropy rate in the case of a discrete time series  $u(n)$ . Consider  
 293 two different blocks of length  $m$  sampled from the time series:

294

$$295 \quad x(i) = \{u(i), u(i + 1) \dots, u(i + m - 1)\}$$

$$296 \quad x(j) = \{u(j), u(j + 1), \dots u(j + m - 1)\}$$

297 And define the distance in Equation 2.16:

298

$$299 \quad d[x(i), x(j)] = \max_{k=1,2,\dots,m} (|u(i + k - 1) - u(j + k - 1)|) \quad \text{Equation (2.16)}$$

300

301 *i.e.*, the maximum distance between the two vectors (Chebyshev distance). Then, we can define a  
 302 quantity in Equation 2.17 like the correlation integral, for a template of length  $m$  at  $x(i)$  within a  
 303 tolerance threshold  $r$ :

304

$$305 \quad C_i^m = \frac{\# j \leq N-m+1, d[x(i), x(j)] \leq r}{N-m+1} \quad \text{Equation (2.17)}$$

306

307 Then, the entropy rate can be estimated as in Equation 2.18:

308

$$309 \quad ER = \lim_{r \rightarrow 0} \lim_{m \rightarrow \infty} \lim_{N \rightarrow \infty} [\varphi^m(r) - \varphi^{m-1}(r)] \quad \text{Equation (2.18)}$$

310

311 Where as in [31] Equation 2.19 gives:

312

$$313 \quad \varphi^m(r) = \frac{1}{N-m+1} \sum_{i=1}^{N-m+1} \log_a C_i^m(r) \quad \text{Equation (2.19)}$$

314

315 Since  $C_i^m(r)$  is essentially the probability that any sequence of length  $m$  is very close to the template  
 316 sequence at time  $i$ , and  $C_i^{m-1}(r)$  the probability that the same holds true for sequences of length  $m -$   
 317 1, then  $\frac{C_i^m(r)}{C_i^{m-1}(r)}$  is the conditional probability that any sequence of length  $m$  is very close to the template  
 318 of length  $m$  at time  $i$  given that the same holds true for  $m - 1$ . Then  $\log_a \left( \frac{C_i^m(r)}{C_i^{m-1}(r)} \right) = \log_a(C_i^m(r)) -$

319  $\log_a(C_i^{m-1}(r))$  the logarithm of this conditional probability. It is easy to see that  $\varphi^m(r) - \varphi^{m-1}(r)$   
320 is the average over  $i$  of the logarithm of this conditional probability [29].

321

322 However, due to finite sample sizes and stochasticity in time series analysis, the entropy rate can be  
323 estimated by what is known as Approximate Entropy [26] and is given by Equation 2.20:

324

$$325 \quad ApEn(m, r, N)(u) = \varphi^m - \varphi^{m-1} \quad \text{Equation (2.20)}$$

326

327 Where  $N$  is the length of the time series  $u(n)$ ,  $m$  is the choice of the length template and  $r$  is the  
328 threshold tolerance choice. Approximate entropy measures the logarithmic frequency with which  
329 segments of length  $m$  that very close together (according to the threshold), stay together through time.

330

331 An approximate formula for ApEn, which we implemented in our study is given by Equation 2.21:

332

$$333 \quad ApEn(m, r, N) \cong \frac{1}{N-m} \sum_{i=1}^{N-m} \log_a \frac{\sum_{j=1}^{N-m} [\# j, d[|x_{m+1}(j) - x_{m+1}(i)| < r]}]}{\sum_{j=1}^{N-m} [\# j, d[|x_m(j) - x_m(i)| < r]]} \quad \text{Equation (2.21)}$$

334

## 335 **2.10 Entropy Rate estimation for a binary MMS speed sequence**

336 Generally, in the case of discrete alphabet sequences with  $k$  symbols,  $0 \leq ApEn \leq \log_a k$   
337

338 Where  $ApEn = 0$  for deterministic time series and  $ApEn = \log_a k$  for random series.

339 In our case (binary MM series),  $k = 2$  and  $0 \leq ApEn_{MM} \leq \log_a 2$   
340

341 For  $a = e$  (natural logarithm choice), the maximum value is  $\ln(2) = 0.69$ , which the base we use in  
342 this study [29].

343

344 A good choice of  $m$  is equal to the embedding dimension, which can be estimated using the False  
345 Nearest Neighbor (FNN) algorithm[32]. Usually,  $m$  is of low dimension, in our case the dimension of  
346 the data was estimated to be 2. The threshold  $r$  is usually set between 0.1 to 0.25 standard deviations  
347 of the time series [29].

## 348 **2.11 Quantifying Information Flow Between Binarized MMS with Local Transfer Entropy**

349 Local Shannon Entropy is defined in Equation 2.22 as the negative logarithm of the probability of an  
350 outcome  $x$  of a random variable [33]:

351

$$352 \quad h(x) = -\log_2 p(x) \quad \text{Equation (2.22)}$$

353

354 where low probability outcomes carry more information than high probability outcomes. Entropy as  
355 defined in Equation 2.23 can then be expressed as the average value of all such outcomes:

356

$$357 \quad H(X) = E[h(x)] = -\sum_x p(x) \log_2 p(x) \quad \text{Equation (2.23)}$$

358

359 Where  $E[.]$  is the expectation (average) operator. An estimator based on samples  $x_n$  is given by  
360 Equation 2.24:

361

$$362 \quad H(x) \cong \frac{1}{N} \sum_{n=1}^N h(x_n) \quad \text{Equation (2.24)}$$

363

364 The Local Mutual Information  $i(x; y)$  and Mutual Information (MI)  $I(X; Y)$  are respectively defined  
365 in Equations 2.25 and 2.26, [34]:

366

$$367 \quad i(x; y) = \log_2 \frac{p(x|y)}{p(x)} = h(x) - h(x|y) \quad \text{Equation (2.25)}$$

368

$$369 \quad I(X; Y) = E[i(x; y)] \quad \text{Equation (2.26)}$$

370

371 Equation 2.26 quantifies the information that we gain when observing  $X$  after we have already observed  
372 another variable  $Y$ .

373

374 Similarly, the Local Conditional Mutual Information and Conditional Mutual Information are given by  
375 Equations 2.27 and 2.28 respectively, [34]:

$$376 \quad i(x; y|z) = \log_2 \frac{p(x|y, z)}{p(x|z)} = h(x|z) - h(x|y, z) \quad \text{Equation (2.27)}$$

377

378  $I(X; Y|Z) = E[i(x; y|z)]$  Equation (2.28)

379

380 It quantifies the information that we gain when we observe  $X$  after considering both  $Y$  and  $Z$  versus  
381 considering only  $Z$ .

382 Finally, local transfer entropy quantifies the flow of information from  $Y$  to  $X$  and is defined in Equation  
383 2.29, [35; 36]:

384

385  $t_{Y \rightarrow X}(n+1, k, l, u) = i(\mathbf{y}_{n+1-u}^{(l)}; x_{n+1} | \mathbf{x}_n^{(k)})$  Equation (2.29)

386

387 Where  $l$  and  $k$  denote the length of the vectors  $\mathbf{y}_{n+1-u}^{(l)} = \{y_{n+1-u-l+1}, \dots, y_{n+1-u-1}, y_{n+1-u}\}$  (storing  
388 past information of the process  $Y$  with a memory of  $l$  samples up to point  $n+1-u$ ) and  $\mathbf{x}_n^{(k)} =$   
389  $\{x_{n-k+1}, \dots, x_{n-1}, x_n\}$ .

390

391 The integer  $u$  denotes the source-destination lag, *i.e.*, the causal time delay between  $Y$  and  $X$  that we  
392 are interested in when we want to calculate the transfer entropy from  $Y$  to  $X$ . For  $u = 1$ , a typical choice  
393 of source-destination lag is given by Equation 2.30:

394  $t_{Y \rightarrow X}(n+1, k, l) = i(\mathbf{y}_n^{(l)}; x_{n+1} | \mathbf{x}_n^{(k)})$  Equation (2.30)

395

396 The local transfer entropy is the mutual information between  $Y$  and the future state of  $X$ ,  $u$  samples  
397 ahead, conditioned on the history of  $X$ . In other words, it measures the information gained that we get  
398 about the future state of  $X$  when considering both its own past and the past states of  $Y$  versus  
399 considering only its past state. Transfer entropy is the expected information gain, averaging over all  
400 states given by Equation 2.31, [33; 35]:

401  $T_{Y \rightarrow X}(k, l) = E[t_{Y \rightarrow X}(n+1, k, l)]$  Equation (2.31)

402

## 403 **2.12 Quantifying Autonomy of an Agent from the Perspective of the Observer**

404 For a child/clinician dyad, we obtain the normalized MMS derived from the fluctuations in angular  
405 speed from the right- and left-wrist sensors throughout the course of the dyadic interaction. Then, we  
406 calculate the entropy rate for consecutive non-overlapping time windows, small enough to ensure  
407 stationarity but not too small, as to ensure convergence. We calculate the entropy rate both for the  
408 normalized MMS and for the corresponding binary MMS trains that we obtain by setting peak values  
409 to “1” and zero values to “zero”.

410

411 To estimate the entropy rate we used Approximate entropy ApEn (developed by Steve M. Pincus [37]),  
412 which measures the amount of regularity or unpredictability of fluctuations over time-series data that  
413 have lengths compatible with experimental settings (unlike other measures of entropy aimed at  
414 measuring regularity but requiring very long times). There are caveats to the use of the ApEn algorithm  
415 [29]:

- 416 i. The ApEn algorithms allows self-counting when counting the number of templates that are  
417 similar to a given data segment, which helps avoid the occurrence of  $\log(0)$  in the calculation.
- 418 ii. However, when the self-similarity threshold  $r$  is very small, the template vector coincides only  
419 with itself, giving ApEn low values, indicating regularity when the system may in fact, be very  
420 irregular.
- 421 iii. ApEn is biased by a factor of  $\frac{1}{N-m}$ , which means that it depends on the template length and data  
422 stream length.

423 ApEn generally depends on the threshold  $r$ , and the embedding delay and embedding dimension of the  
424 reconstructed space (which is equal to the template length). It is generally suggested, that in order to  
425 compare the approximate entropies of different time series, all parameters must be equal. However, for  
426 the scope of our study, we chose the threshold parameter  $r$  to be equal to  $0.2\sigma$ , as recommended in the  
427 literature [29]. The embedding delay was chosen according to the minimum Average Mutual  
428 Information criterion, to ensure maximum novelty between consecutive samples in the reconstructed  
429 space. As for the template, we chose it to be  $1/R$ , where  $R$  is the average rate (frequency) of MMS in  
430 the time window of interest. This equals to the average time-distance between two spikes and our  
431 choice ensures that in the reconstructed space, the coordinates of a point in time include both zeros  
432 (“*quiet moments*”) and spikes and that the system does not bounce back and forth from a single  
433 coordinate of zeros components. In this way, we can minimize any bias introduced by differences in  
434 spike rates, in the computation of self-similarity by the algorithm. Sparser time windows will contain  
435 the same percentage of “*active*” moments as denser time windows. Since it turns out that, for our  
436 datasets,  $0.1 < R < 0.5$ , we have  $2 < m < 10$ , which according to the literature is within the optimal  
437 range [29]. Moreover, since  $N = 1000$ , the bias introduced by  $m$  in the prefactor is very small.

438 ApEn is computationally efficient. One can easily see that the worst-case time complexity of ApEn is  
439  $O(N^2)$ . Furthermore, it has lower effect from noise in the data. If data is noisy, the ApEn measure can  
440 be compared to the noise level in the data to determine what quality of true information may be present  
441 in the data [29]. We here notice the difference between the criterion for randomness in the Gamma  
442 parameter space, when the shape is 1, which is the special case of the memoryless exponential  
443 distribution. In our empirical characterization of the MMS from the peak fluctuations, which follow a  
444 scaling power law, as the shape approaches the value of 1 representing the exponential distribution  
445 case, the  $NSR = \log\theta$  approaches its maximum levels [3]. The differential entropy for the Gamma  
446 distribution has the general form in Equation 2.32, [38]:

447

448 
$$h(X_g) = k + \log\theta + \log\Gamma(k) + (1 - k)\psi(k) \quad \text{Equation (2.32)}$$

449 We will show later that discrete samples  $X_G$  that follow the Gamma distribution, such as the MMS,  
450 have entropy roughly equal to  $h(X_G) - \log \Delta$ , when  $\Delta$ , is the discretization step. Because of the Power  
451 Law discussed before,  $\log(k) = a + b \log(\theta) + \varepsilon$ , we have in Equation 2.33:

452

$$453 \quad H(X_G) \cong e^{a+\varepsilon} e^{bNSR} + NSR + \log \Gamma(k) + (1-k)\psi(k) - \log \Delta \quad \text{Equation (2.33)}$$

454

455 As the NSR increases,  $k \rightarrow 1$  and thus,  $H(X_G) \rightarrow e^{a+\varepsilon} e^{bNSR} + NSR + 1 - \log \Delta$ . In Section 4, we  
456 will experimentally show that, for  $\log \theta < 1$  in Equation 2.34:

457

$$458 \quad H(X_G) = O(NSR), k \rightarrow 1 \quad \text{Equation (2.34)}$$

459

460 However, in the case of ApEn, we consider a process of the form  $X_G * X_B^t$ , where  $X_B^t$  is the binary spike  
461 series, determining the temporal distribution of the peaks in time. In fact, we will empirically  
462 demonstrate that  $X_B^t$  is almost independent from  $X_G$ , implying that ApEn measures the information  
463 content of the binary spike time series, characterizing the motor code. On the other hand, randomness  
464 in the sense of NSR (or equivalently  $H(X_G)$ ), refers to the temporal component of the events and  
465 answers the question of predictability in time, whereby predicting future events in time does not benefit  
466 from knowledge of prior or current event times. We will see later that these two elements of the Gamma  
467 distributed MMS are indeed separable and within the current context, tend to be orthogonal.

468

469 In this sense, we propose that the entropy rate (ER) derived from ApEn is a measure to characterize  
470 autonomy in the system. Since ER is a proper way to quantify regularity vs. randomness, we can safely  
471 presume that the information levels that it carries also measures the ability of an observer to predict the  
472 motor behavior of an agent, when the two of them engage in a dyadic social interaction. For example,  
473 when the clinician observes the behavior of a child that engages in repetitive and predictable motions,  
474 they can easily learn their behavioral and motor patterns. This also implies that they can more easily  
475 detect a problem in a child that behaves predictably and set up the context to better control the situation.  
476 In this sense, the more predictable the situation is, the more control it will be afforded by the external  
477 agent.

478

479 Following our argument, we redefine socio-motor agency as the balance between control and  
480 autonomy. Signal-to-Noise ratio characterizes the ability of an agent to (internally) control their own  
481 behavior. Entropy rate characterizes the ability of the agent to act autonomously (while minimizing  
482 external control by another agent) in a social interaction.

483



484 Finally, using transfer entropy we can quantify the amount of causal influence from the clinician to the  
485 child and vice versa, without the need to use any model or make any other assumptions.

486

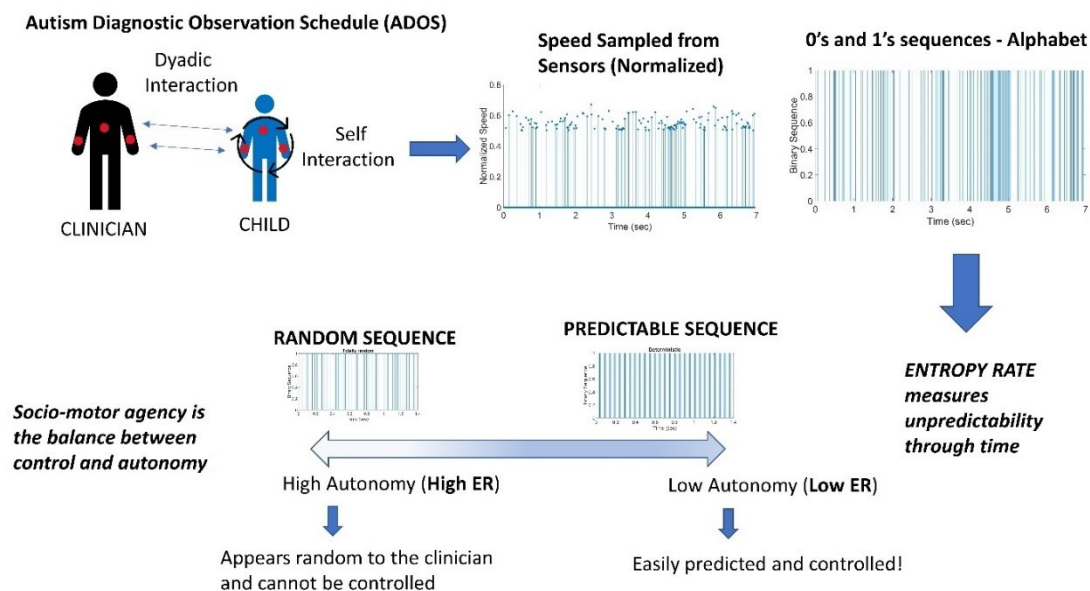

487

488 **Methods Figure. Digitization of the Autism Diagnostic Observation Schedule (ADOS): Angular**  
489 **speed samples (128 Hz) from wearable sensors on the wrists and torso of the child and clinician**  
490 **are normalized and binarized to obtain discrete sequences of 0's and 1's. Entropy rate estimates**  
491 **measure the unpredictability of the underlying binary processes to characterize the agents'**  
492 **autonomy in the dyadic social interaction. The analysis is performed on data from time windows**  
493 **of ~7.8 secs which proved optimal to attain high confidence intervals.**

494

### 495 2.13 The Autism Diagnostic Observation Schedule (ADOS-2) Scoring System

496 The ADOS-2 Modules consist of tasks that the clinician performs with the child to observe behavior  
497 related to the diagnosis of ASD and reach a conclusion. There are different Modules. Each child is  
498 administered a single Module based on their expressive language level, developmental age and their  
499 unique interests and abilities. However, they are designed in such a way that ensures that judgements  
500 about social and communicative abilities are as independent as possible from level of language ability  
501 and chronological age.

502

503 Both Modules (toddler) T and 1 are administered to non-speaking children, Module T for ages 12-30  
504 months and Module 1 for children over 31 months. Module 2 is administered to children of all ages  
505 who are using phrase speech but are not yet speaking verbally with fluency. Modules 3 and 4 are  
506 administered to individuals that are speaking with verbal fluency, with Module 3 specifically designed  
507 for Children / Younger adolescents that can still play with action figure-type toys and Module 4 for  
508 older adults. All Modules are administered under the assumption that the individual can walk  
509 independently and is free of visual or hearing impairments. This assumption is erroneous, but we use

510 the ADOS-2 test not to diagnose but to evoke social situations leading to movement patterns likely  
511 present in such situations.

512

513 Our current analysis focuses on Modules 1,3 and 4. We suggest the following categorization of tasks  
514 to better relate our digital biomarkers to the clinical tasks that evoke some aspect of social interactions  
515 and emotions present in human gestural communication, which is mediated by movements:

516

517 *Socio-Motor Tasks:* These are tasks that engage interactive movements within the child, the clinician,  
518 and jointly between the child and clinician. Construction Task, Joint Interactive Play, Demonstration  
519 Task, Cartoons, Conversation and Reporting and Break Tasks all have in common the Child's Socio-  
520 Motor behavior involvement. Construction Task consists of an interaction between the Clinician and  
521 Child that involves reaching over the Clinician's arm to ask for block pieces that may form a shape.  
522 Joint Interactive Play consists of a Play Sequence between the Child and the Clinician that involves  
523 body movements. During Demonstration Task the Child uses their body to represent objects and mime  
524 the use of each object. During Cartoon Task, the Clinician observes the Child's gestures and  
525 coordination with speech. Similarly, during Conversation and Reporting body language and facial  
526 expressions / gestures are observed alongside general communicative skills. During Break the Child is  
527 expected to move around the room.

528

529 *Emotional Tasks:* These are tasks that probe the child's emotional states. Emotions, Social Difficulties,  
530 Friends, Relationships, and Marriage and Loneliness all evoke strong emotional responses from the  
531 Child. During the Emotions Task, the Child is asked questions about social relationships, different  
532 emotions such as happiness, fear and anxiety and details about the manifestation of these emotions  
533 under different circumstances. Social Difficulties and Annoyance consist of questions related to social  
534 interactions at school or work, such as bullying or teasing. Friends, Relationships, and Marriage are  
535 designed to evaluate the Child's concepts on topics such as friendship and social relationships and the  
536 questions asked can cause strong emotions in the Child. Similarly, during Loneliness task, questions  
537 are asked about the concept of loneliness, which is a heavy topic, especially for Children on the Autism  
538 Spectrum, that struggle with social rejection and bullying from a young age.

539

540 *Abstract Tasks:* These are tasks that require higher, abstract-level of cognition. Make-Believe Play,  
541 Description of a Picture, Telling Story from a Book, and Creating a Story all help observe higher  
542 cognitive skills. Make-Believe Play involves the use of dolls an action figures and the Child is tested  
543 for their ability to perceive them as animate beings and produce imaginative sequences of actions that  
544 involve these objects. Perception or the lack of it of objects as animate beings is a concept frequently  
545 encountered within the context of the Theory of Mind. During Description of a Picture Task the  
546 Clinician observes the Child's use of language/ communication and the level of interest in the picture  
547 presented. Telling a Story from a Book is similar but involves a story from a book instead of a picture  
548 and humor and presumption of the feelings of the characters from the book are evaluated as well.

549 After the administration of Module 3 a scoring system is used to evaluate the levels of Social Affect  
550 (SA) and Restricted and Repetitive Behavior (RRB). The scores are added up to determine a final

551 score, from 0 to 10. A score of 0 or 1 indicates Minimal to No Evidence of ASD related symptoms,  
552 scores between 2 and 4 indicate a Low Level of ASD related symptoms, 5 to 7 Moderate and 8 to 10  
553 High. A score of 9 or more determine that the Child is Autistic whereas a score of 7 or more that the  
554 Child is in the Autism Spectrum. Furthermore, Social Affect consist of Communication (Reporting of  
555 Events, Conversation and Descriptive, Conventional, Instrumental, or Informational Gestures) and  
556 Reciprocal Social Interaction (Unusual Eye Contact, Facial Expression Directed to Examiner, Shared  
557 Enjoyment in Interaction, Quality of Social Overtures, Amount of Reciprocal Social Communication,  
558 Overall Quality of Rapport) Scorings. RRB consists of scoring Stereotyped/ Idiosyncratic Use of  
559 Words or Phrases, Unusual Sensory Interest in Play Material/ Person, Hand and Finger and Other  
560 Complex Mannerisms and Excessive Interest or Highly Specific Topics/ Objects or Repetitive  
561 Behaviors.

## 562 **3 Results**

### 563 **3.1 Age-dependent Dyadic Motor Control Separates Neurotypical (NT) from Children on the** 564 **Autism Spectrum Disorders (ASD)**

565 The micro-movement spikes (MMS) derived from the biosensors' signals, offer a standardized time  
566 series that scales out anatomical differences across participating children of diverse ages. This  
567 standardized signal within the ADOS-2 tasks contexts, is well characterized by a continuous Gamma  
568 process. Here (as in prior work involving other biosensors) the Gamma shape  $k$  and the Gamma scale  
569  $\theta$  parameters can be empirically estimated from the normalized spikes, using Maximum Likelihood  
570 Estimation (MLE) with 95% confidence [3; 39]. The normalized spikes, which conserve the original  
571 time latencies of the raw peaks, represent a time series of quiet times (at averaged activity) interspersed  
572 with bouts of activity evoked individually for each child and pertinent to the task at hand. We measure  
573 these biorhythms individually for the child's and clinician's dominant hand. We also measure them  
574 from the shared, synchronous activities of the social dyad composed by the child and the clinician.

575

576 The empirically estimated Gamma parameters localize each child-clinician's dyadic interaction for  
577 each task on the Gamma parameter plane with 95% confidence intervals (Figure 2A). These points  
578 represent the empirical probability density function (PDF) of their joint dyadic interaction. When we  
579 plot the full scatter estimated from each task in the ADOS, for all children, a tight linear relation  
580 emerges whereby the log-log plot follows a scaling power law, of the form  $k \cong a\theta^b$ . (See methods for  
581 a more in-depth analysis of the power law and the micro-movement spikes (MMS) time series  
582 transformation).

583

584 This relationship, first described as a maturation law in humans' voluntary decision-making, mediated  
585 by pointing motions [3], is reproduced here for gyroscopic data reflecting joint dyadic angular speed,  
586 such that as the Gamma scale value decreases, the Gamma shape value increases. Because knowing  
587 one, we can predict the other with high certainty, we can then reduce these two parameters of interest  
588 to one parameter summarizing these motor signatures of the interacting dyad. We can also do so for  
589 each individual signature, *i.e.*, those of the child and those of the clinician in standalone mode.

590

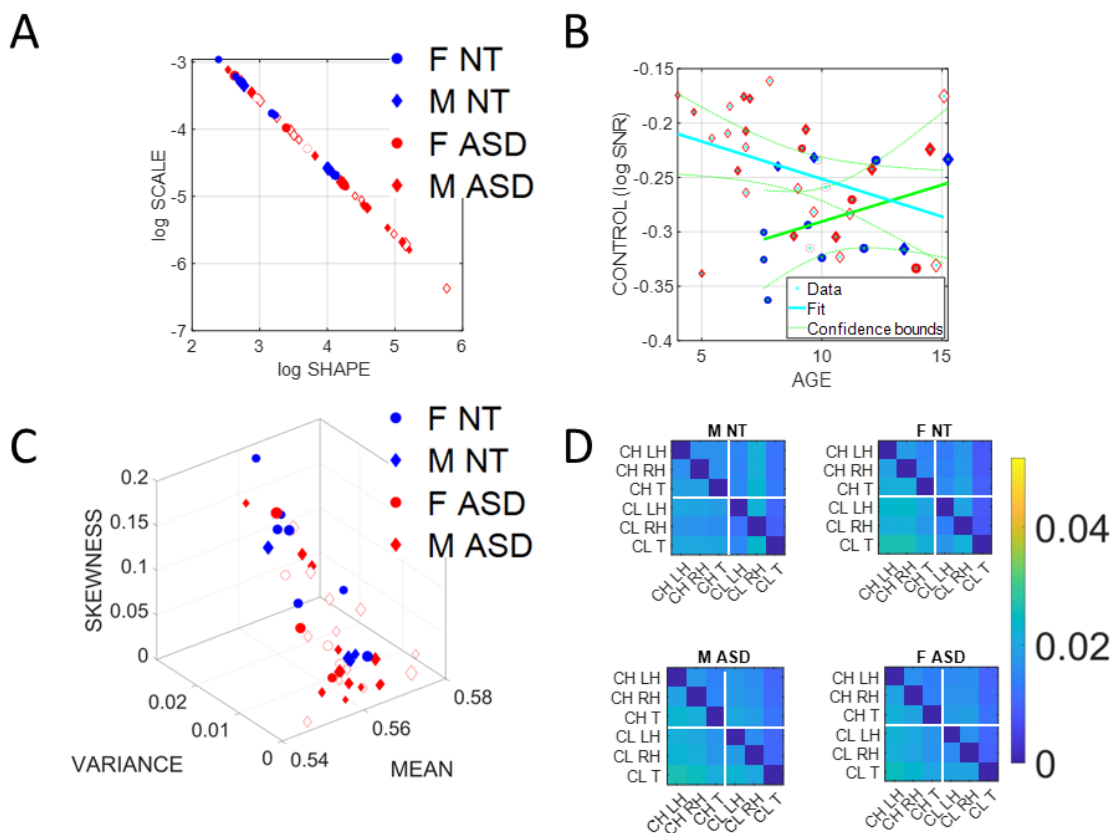

591

592 **Figure 2. Summary stochastic characterization of micro-movement spikes, MMS, derived from**  
 593 **ADOS-driven dyadic interactions, using angular speed registered from the right (dominant)**  
 594 **wrist. Activity encompasses the entire ADOS session. Filled markers represent first visits to the**  
 595 **clinician, unfilled markers are subsequent visits. (A) Empirically estimated Gamma Shape and**  
 596 **Scale (NSR) for each participant using Modules 1, 3 and 4 of the ADOS test as a backdrop**  
 597 **behavioral assay. The size of the marker is proportional to the age of the participants. Empirical**  
 598 **Gamma plane of individual children and clinicians separating young from older children and**  
 599 **adults in an interpretable map of human neuromotor maturation. (B) Child’s negative Gamma**  
 600 **scale parameter ( $\log -NSR = \log SNR$ ) denotes control as a function of age. Observe (cyan line)**  
 601 **the decreasing trend of SNR with age for ASD in contrast to the opposite trend for NT (green**  
 602 **line). (C) Parameter space spanned by the empirically estimated Gamma mean (x-axis), standard**  
 603 **deviation (y-axis) and skewness (z-axis) derived in (A). Marker size is proportional to age. (D)**  
 604 **Quantification of Transfer Entropy for social dyads involving clinician and child obtained for**  
 605 **males and females in the NT and the ASD groups, using 6 sensors, 3 on the clinician and 3 on the**  
 606 **child, outputting time series of angular speed motion on the left and right wrists and the trunk**  
 607 **of each social agent in the dyad. Off-diagonal entries represent joint dyadic activities.**

608 Importantly, the continuous Gamma family of probability distributions has the first (mean) and second  
 609 (variance) moments expressed in terms of the shape and scale as in Equations 3.1:

610

$$611 \mu = k\theta, \sigma^2 = k\theta^2$$

Equation (3.1)

612

613 Then, unfolding Equation 3.1, the Noise-to-Signal Ratio (NSR) of the MMS reduces to:

614

$$615 \quad NSR = \frac{\sigma^2}{\mu} = \frac{k\theta^2}{k\theta} = \theta \quad \text{Equation (3.2)}$$

616

617 The Gamma scale parameter in Equation 3.2 fully characterizes the noise of the biorhythmic motor  
618 patterns of the interactive dyad, *i.e.*, in relation to their joint level of fluctuations of angular speed  
619 during the ADOS activities.

620

621 Empirical estimation of these parameters across thousands of participants over a decade of work  
622 involving humans along the lifespan, and across disorders of the nervous system, in voluntary,  
623 involuntary, spontaneous, and autonomic processes, has revealed an interpretation for the Gamma log-  
624 log parameter plane. Distributions that fall along high NSR regimes are also close to the memoryless  
625 random regime of the special exponential distribution case (when  $k = 1$ ). Points in mid NSR correspond  
626 to heavy-tailed Gamma distributions. Then, low NSR (or high signal =  $1/NSR$ ) are congruent with  
627 symmetric shapes (Gaussian-like) distributions.

628

629 High-signal Gaussian regimens are highly predictable in contrast to High-noise memoryless random  
630 Exponential regimes. As such, the Gamma parameter plane is empirically interpretable and the  
631 locations of the distributions representing the shape and scale signatures of individual participants  
632 change in an orderly ontogenetic manner whereby a decrease in the NSR is accompanied by a decrease  
633 in randomness (away from the memoryless exponential distribution at shape = 1). The lack of  
634 maturation of the human nervous system is well characterized by high NSR and random fluctuations  
635 previously found across ASD [3]. In this sense, we equate high SNR= $1/NSR$  with an index of  
636 controllability. As per the scaling power law, high SNR of the MMS is equated with high predictability  
637 of the person's self-referenced, self-generated motor code. This motor code represents a proxy of  
638 kinesthetic reafference, *i.e.*, the continuous stream of motor activity from the periphery, serving as an  
639 index reflecting the quality of the motor feedback to the central controller of the nervous system.

640

641 Then, as this motor code is shared with another agent during social dyadic interactions, the distributions  
642 of the joint dyadic interactions of the participant and the clinician, for the 26 participants (11  
643 neurotypically developing NT and 15 ASD), can be appreciated in Figure 2A following a power law.  
644 These distributions are derived from the MMS that fluctuations in angular speed produced in the  
645 dominant hand (see Methods Figure).

646

647 Furthermore, Figure 2B shows that the  $\log(SNR)=-\log(NSR)$  (denoted as the index of control) of the  
648 interacting socio-motor dyad has an age-dependent pattern. In NT children, as the age increases, control  
649 tends to slightly increase *i.e.*, a slight positive trend is reflected in the slope of the line fitting the (blue

650 NT scatter), NT: intercept = 3.0271  $p = 0.0067$ , slope = 0.0786,  $p = 0.362$ . In contrast, as ASD children  
651 age, control tends to decrease, *i.e.*, a strong negative trend is quantified in the slope of the line best  
652 fitting the red ASD scatter, intercept = 5.5317  $p = 5.65 \times 10^{-12}$ , slope = -0.1074,  $p = 0.0463$ .

653

654 In Figure 2C we compare the two groups by localizing each participant on the Gamma moments space  
655 spanned by the empirical mean, variance, and skewness, whereby each point represents the empirically  
656 estimated moments of the Gamma PDF of joint dyadic activity for each child-clinician pair. This result  
657 demonstrates a tendency of the joint dyad moments to separate NTs from ASD participants, as they  
658 interact with an adult clinician, expressing marked differences between males and females.

659

660 To better appreciate the sex differences, we obtain pairwise the Transfer Entropy (TE) from child to  
661 clinician and from clinician to child. See methods for an extended definition, but recall that TE is the  
662 reduction in uncertainty of predicting the future of X when we consider the process Y. In Figure 2D,  
663 we can see for each matrix the pattern that emerges when considering the time series data from each  
664 of the 6 sensors attached to the child's and clinician's two hands and trunk. The cross terms in the off-  
665 diagonal entries of the matrix (top right-hand entries 1,4 to 1,6; 2,4 to 2,6; 3,4 to 3,6; and bottom left-  
666 hand entries 4,1 to 6,1; 4,2 to 6,2 and 4,3 to 6,3) represent the dyadic cases of child  $\rightarrow$  clinician and  
667 clinician  $\rightarrow$  child, respectively. There, in the shared entries of the matrix we see that in ASD, males  
668 show a decrease in TE values while females show an increase. In the context of the ADOS, females  
669 evoke a reduction in the clinician's uncertainty predicting the impending females' motions, *i.e.*,  
670 perhaps an inherent bias that partly accounts for the disparate ratio of 4-5 males per each female  
671 diagnosed with ASD. We will further explore these differences to try and understand the interplay  
672 between the NSR as an index of controllability (predictability) and the overall sense of socio-motor  
673 agency in each of the ADOS tasks, for males and for females.

674

675 In the diagonal sub-matrices (top left-hand entries 1,1 to 1,3; 2,1 to 2,3; 3,1 to 3,3; and bottom right-  
676 hand entries 4,4 to 4,6; 5,4 to 5,6 and 6,4 to 6,6) we represent the patterns within the individual's body  
677 parts. There we appreciate higher values of TE from child  $\rightarrow$  child in both ASD males and females,  
678 with ASD females having higher TE than ASD males. As with the shared dyadic activity, here in the  
679 individual patterns, the highest differences for clinician  $\rightarrow$  clinician can be appreciated in the ASD  
680 females.

681

### 682 **3.2 Quantifying Dyadic Social Agency Reveals Differences Between NT and ASD**

683 High levels of NSR in the MMS fluctuations from the angular speed coincide with memoryless random  
684 regimes of motor patterns - well characterized by the exponential distribution previously found in  
685 autistic individuals [3; 40]. It has been proposed that under such random and noisy motor code, it is  
686 difficult to have high quality motor feedback contributing to a predictive code. Such predictive code  
687 would be necessary to compensate for sensory-motor and inertial time delays inherent in the nervous  
688 system [3; 14; 40; 41; 42].

689

690 In a dynamic dyadic social interaction such as that taking place during the ADOS, it is then difficult to  
691 exert control over the interaction because presses by the clinician and overtures by the child are not  
692 occurring at the expected timely rates. This temporal mismatch in autism alone can bias the rating by  
693 the clinician in ways that differ between NT and ASD, but also differ between males and females. Here  
694 we equate high NSR with low predictive control and posit that the type of socio-motor agency required  
695 in a naturalistic social interaction will be impacted by poor controllability levels on one side of the  
696 dyad. We then question whether dyadic-based control (*i.e.*, shared by the child and clinician) is  
697 differentially impacted in ASD participants.

698

699 Another aspect of dyadic social agency is autonomy. As mentioned earlier, autonomy is the ability of  
700 the child to lead the conversation as much as the clinician does, rather than always following the lead  
701 of the clinician. An obvious way to quantify the degree to which the clinician is leading would be by  
702 using some form of causal analysis between data recorded on the clinician and data recorded on the  
703 child. As our main approach however, we choose to quantify autonomy in ways that depend on data  
704 recorded from wearable sensors on a single agent which as we will show, is intuitive and can be applied  
705 in a clinical setting, to help digitize the ADOS.

706

707 We introduce (behavioral) spike trains from the MMS derived from the time series of angular speed.  
708 We use entropy metrics to examine the degree to which the spikes behave randomly or  
709 deterministically (*i.e.*, containing periodic, systematic patterns.) To that end, we use entropy rate, a  
710 metric well suited to interrogate the stochastic regimes of spike trains [26; 27].

711

712 From the MMS derived from time series of angular speed, recorded either from the left or the right  
713 hand of the child, we derive binary sequences whereby a sequence of 1's corresponds to sudden bouts  
714 of activity and 0's to "quiet" sampling periods, when no significant change above the person's average  
715 activity occurs in the angular speed profile. Another way to view these binary sequences is as the  
716 manifestation of an underlying "alphabet" that characterizes the predictability of the motor code. Zeros  
717 and ones will appear with some probability, which we expect to change at some time scale, due to the  
718 non-stationary nature of human motion. But if we restrict ourselves to small time windows (~7.8  
719 seconds, determined as optimal for empirically estimated confidence intervals, upon sampling different  
720 sizes), this time window is small enough that the process can be viewed as stationary, yet large enough  
721 to contain a satisfactory number of samples lending statistical power to our empirical estimation per  
722 window. As such, 7.8 seconds is our unit of time for the spike trains that we derived. Using this MMS  
723 per unit of time as our data type, we can then measure the degree of randomness of the child's motions,  
724 by estimating the entropy rate (see Methods). Furthermore, we then compare it to transfer entropy  
725 (TE) obtained from the child and clinician, a causal metric that can inform us of who leads the  
726 interaction for any given task.

727

728 We argue that a suitable scale of autonomy is one in which, at one extreme, a high degree of  
729 randomness is a measure of a system at its highest degree of autonomy. This is the type of state where  
730 the system is uncontrollably "hidden" from the controller. There is no opportunity to control the person.

731 At the other end, the lowest degree of randomness leads to a systematic, deterministic pattern, highly  
 732 controllable. While in the former, the child's system with excessive autonomy prevents social exchange  
 733 with the clinician in that the clinician cannot control the child, in the latter, the clinician can absolutely  
 734 control the child. Either extreme is detrimental to the development of rapport or turn-taking in a social  
 735 exchange. A happy medium is one in which while the child preserves a degree of autonomy that enables  
 736 a balanced social exchange, the clinician also partakes in a give-and-take interaction, rather than  
 737 leading the child most of the time.

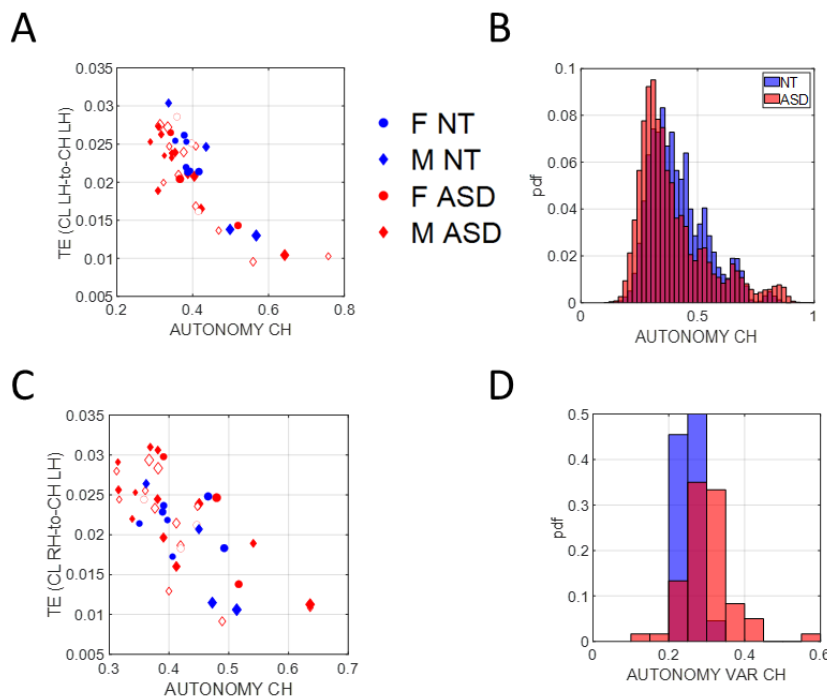

738

739 **Figure 3. Scales of socio-motor agency according to index of autonomy. (A) Average transfer**  
 740 **entropies between child→clinician taken over windows of ~7.8 secs duration, per participant**  
 741 **(filled in markers are first visit to the clinician, unfilled markers are subsequent visits) vs.**  
 742 **autonomy (Ap Ent) reveal higher autonomy index in NT, a trend that is also quantified in (B).**  
 743 **As the child autonomy decreases, the CL→CH TE (left hand) decreases. Adding the CL past**  
 744 **activity does not contribute more information about the CH state than looking at the CH past**  
 745 **activity alone. (C) This is also the case for the right hand. (D) Autonomy variability (variance**  
 746 **over the mean) throughout a session, is higher for the ASD group, both for the child and the**  
 747 **clinician involved.**

748

749 We test our new hypothesis that motor autonomy relates to measures of entropy by comparing TE (a  
 750 measure of causality) from the child to the clinician, with entropy rate, a measure spanning a scale  
 751 from totally random to totally deterministic states of the spike-based code. We show in Figure 3A an  
 752 age-dependent trend spanning two scatters. In older neurotypical children, the scatter aligns such that  
 753 as the child's entropy rate (denoting a scale of autonomy) increases, so does the TE denoting a causal  
 754 lead of the child over the clinician. In contrast a second scatter emerges for younger children whereby  
 755 the trend is less visible, indicating that these children's index of autonomy is not as evident during the  
 756 exchange and the causal lead (TE) denoting the child's lead over the clinician's lead, is less evident.



757 We can appreciate the shift in this metric of autonomy in Figure 3B where the histogram of the ASD  
758 children is shifted to the left, indicating lower density values than NT children.

759 Since the left hand is not the dominant hand in these children, we plotted the histograms pertaining to  
760 the left hand as well, to see if these effects consistently emerged. We see in Figure 3C that across  
761 multiple time windows, the pdf for the neurotypical group is shifted to the right, meaning that on  
762 average, NTs have higher values of autonomy than ASDs. Since autonomy also varies throughout  
763 sessions, plotting the autonomy variability (variance of this index over the mean of this index) for  
764 different participants in Figure 3D shows that for ASDs, child and clinician variability is higher than  
765 most NTs. This variability index tends to separate ASD from NT participants, particularly for later  
766 visits (as the child aged, over 2 years and a half that the study spanned.)

### 767 3.3 Age-Dependent Autonomy Across Children vs. Clinician's Autonomy Robustness

768 As we saw earlier, the SNR (1/NSR) of the control index, has trend with age that differs between the  
769 two groups. NT children show increasing control with age, whereas ASD children show a decreasing  
770 trend. Likewise, here we ask if the index of autonomy also changes with age. To that end, we examine  
771 this index as a function of age across the children. We also examine it for the clinician across the  
772 children's ages.

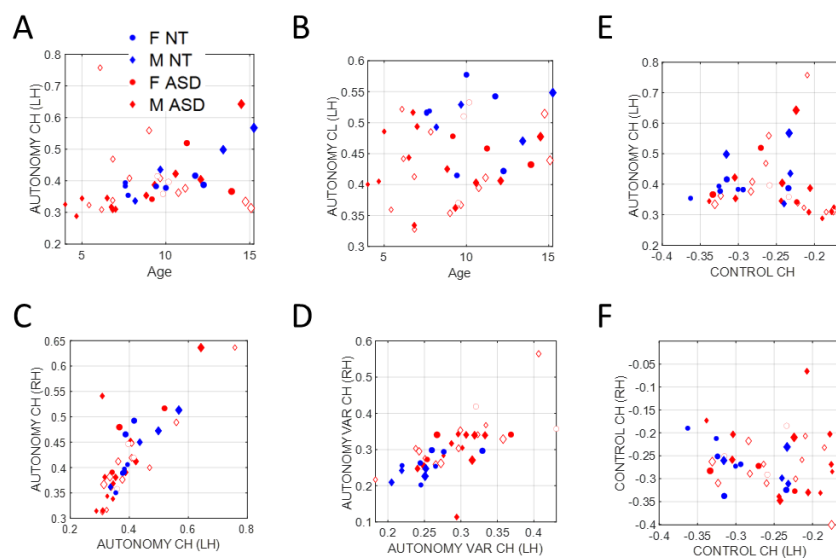

773

774 **Figure 4. Non-equivalence of the index of autonomy and the index of control. Plots reflect the**  
775 **average child and clinician index of autonomy for left hand motions vs. age as well as right vs.**  
776 **left hand index of autonomy, index of autonomy variability and index of control. (A) Child index**  
777 **of autonomy is positively and linearly correlated with age. (B) There is no trend between the**  
778 **clinician index of autonomy across children's ages. (C) Equivalence of index of autonomy derived**  
779 **from the left hand vs. the right-hand motions. (D) Index of autonomy variability also correlates**  
780 **between the two hands and separates NT (blue) vs. ASD (red). (E) No definite relationship**  
781 **between index of control and index of autonomy is observed, however for small values of control**  
782 **index there seems to be a positive trend which then becomes negative for high values. (F) Left**  
783 **hand motions have higher variability in the index of control than do right hand motions.**

784

785 We find that the child’s index of autonomy for both NT and ASD increases with age in all cases (Figure  
786 4A). This result reveals that the ability of the ASD child to actively participate in a dyadic interaction  
787 is a human socio-motor developmental trait that improves with age. In contrast, Figure 4B shows that  
788 the clinician’s autonomy is independent of the child’s age. In this case, the adult clinician shows no  
789 discernable trend.

790

### 791 **3.4 Indexes of Autonomy and Control are Not Equivalent**

792 The child’s index of autonomy and the variability of this index extracted from the sensors in both  
793 hands, are linearly correlated (Figure 4C). In the case of the index of control however, there is higher  
794 variability of the mean autonomy index across subjects when we use data from the left-hand sensor (as  
795 shown in Figure 4D, where separation of the NT from ASD is evident). For this reason, we focused  
796 our analysis on the non-dominant, left-hand motions. Furthermore, the index of autonomy derived from  
797 the left-hand motions as well as its index of control, are positively correlated for small values of control  
798 index, but negatively correlated for higher values. This is shown in Figure 4E. In other words,  
799 autonomy and control are not equivalent metrics. This can be further appreciated in Figures 4D  
800 (autonomy variability) vs. Figure 4F (index of control.)

801

### 802 **3.5 Male vs. Females Respond Different to ADOS Tasks - The case of ASD Females**

803 Besides the quantification of *indexes of control* and autonomy as components of socio-motor agency,  
804 we rendered important to consider the heterogeneity of tasks in the ADOS’ modules 1, 3 and 4 used  
805 here across children with different levels of spoken language. We grouped tasks into three main  
806 categories: Socio-Motor, requiring high motoric components (frequent movements and gestures);  
807 Abstract, tasks more “mental” in nature, requiring abstraction, theory of mind, and other cognitive  
808 components; Emotional, tasks that elicit feelings and emotional reactions, strongly *visibly* impacting  
809 the child’s emotional states.

810

811 We calculated the average indexes of autonomy and control across all participants, derived from  
812 samples corresponding to the different ADOS tasks. Then, we assessed potential differences between  
813 ASD and NT participants, focusing on the comparison of males vs. females. We found that ASD males  
814 respond with lower index of autonomy than do NT males. In contrast, ASD females vs. NT females,  
815 manifest very modest differences, inclusive of three tasks with no significant differences (Social  
816 Difficulties and Annoyance, Loneliness (both Emotional type tasks) and Construction Task (Socio-  
817 motor type task)).

818

819 It is therefore clear, that ADOS tasks inherently bear a lack of differentiation between NT and ASD  
820 females, unlike their male counterparts for which the differences are large. This can be appreciated in  
821 Figure 5AB (males) and Figure 5CD (females) where we color code the task type and code it  
822 numerically according to the name of the task (Methods describe the ADOS tasks included from each  
823 module.) Modest differences were observed between females. Tasks with nonsignificant differences in  
824 females were Social Difficulties and Annoyance, Loneliness (both Emotional type tasks) and

825 Construction Task (Socio-motor type task). Notice that despite the non-significance, emotional tasks  
 826 have broader spread in ASD females along the index of control than do NT females. In contrast, the  
 827 index of autonomy has comparable spread for both. As socio-motor agency is defined as the ratio of  
 828 index of autonomy/ index of control, this implies that across these ADOS emotional tasks, NT females  
 829 have more social agency than ASD females. In contrast to females, a statistically significant difference  
 830 between the two male groups was observed for all tasks. ASD males shift significantly to lower values  
 831 of the index of autonomy across all tasks, but visibly socio-motor tasks are deeply affected.

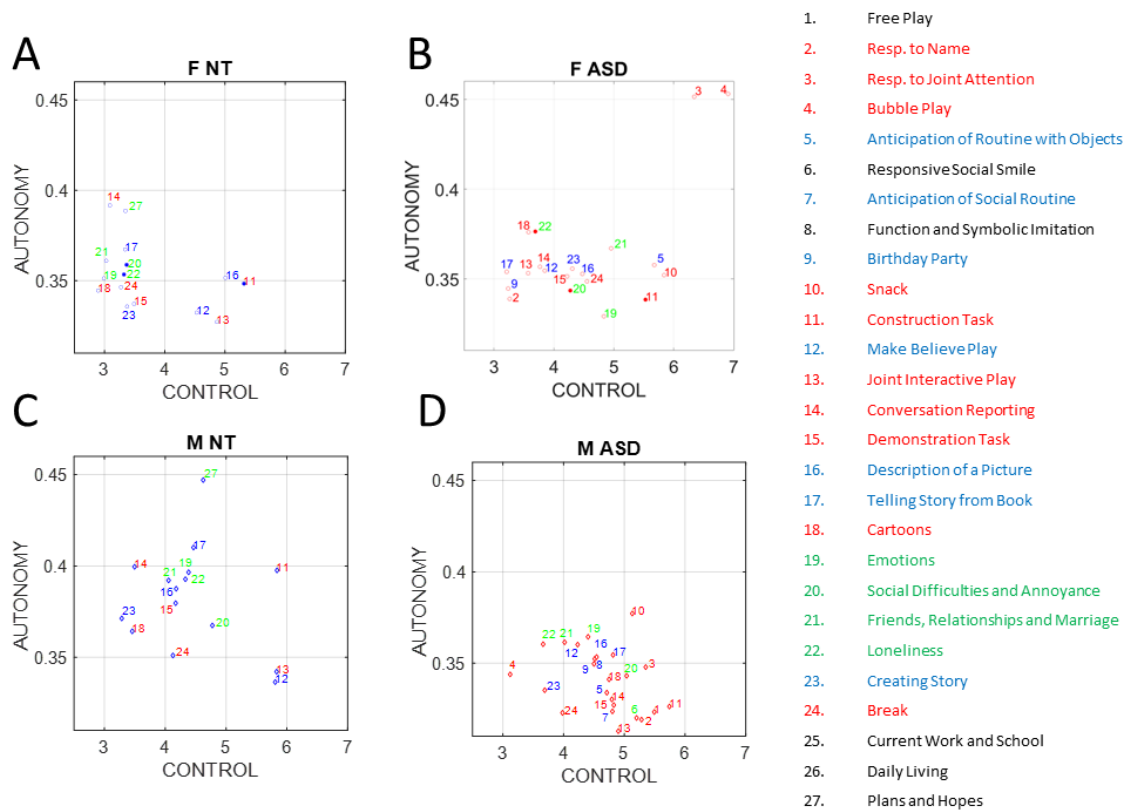

832  
 833 **Figure 5. Differences between males and females in average index of autonomy vs. control. Filled**  
 834 **circles code non-significant differences at the .05 level, while non-filled circles denote significant**  
 835 **differences between NT and ASD participants. (A) NT females. (B) ASD females. (C) NT males.**  
 836 **(D) ASD males.**

837  
 838 **4 Theoretical Considerations at the Intersection of Stochastic Analyses and Information**  
 839 **Theoretical Metrics**

840 The following section of the paper aims at exploring the relationship between the temporal code of the  
 841 binary spikes embedded in the Gamma process, and the Gamma process itself, spanning information  
 842 about the fluctuations in spike amplitude and inter-peak-timings. The latter follows a Poisson process,  
 843 while the former is more generally revealing of multiple overlapping processes. Part of our quest is to  
 844 try and deconvolve these overlapping processes in physiological data that contains multiple afferent  
 845 streams from different levels of functionality. These levels may span from autonomic (pacemaker like  
 846 regularities) to reflexive, to involuntary, to spontaneous and automatic, to voluntary levels of control  
 847 previously proposed {Torres, 2011 #241}. At the core of our proposed measure of socio-motor agency

848 lies the balance between bottom-up autonomy and top-down control, which we track through the  
849 spatio-temporal code of the time series of spikes.

850

#### 851 **4.1 Entropy-Spike rate and NSR relationship in the case of standardized biometric data** 852 **sampled from child-clinician dyadic interactions.**

853 Recall that the entropy rate of a discrete process is defined as:

854

$$855 \quad H(X) = \lim_{n \rightarrow \infty} \frac{1}{n} H(X_1, X_2, \dots, X_n) \quad \text{Equation (4.1)}$$

856

857 The case in Equation 4.2 is when all  $X_i$  are independently identically distributed (*i.i.d.*) [43]:

858

$$859 \quad H(X) = \lim_{n \rightarrow \infty} \frac{1}{n} H(X_1, X_2, \dots, X_n) = \lim_{n \rightarrow \infty} \frac{1}{n} (H(X_1) + H(X_2) + \dots + H(X_n)) =$$

$$860 \quad \lim_{n \rightarrow \infty} \frac{1}{n} (nH(X_1)) = H(X_1) \quad \text{Equation (4.2)}$$

861

862

863 If  $X_i$  have identical entropies but are not independent, the following inequality holds in Equation 4.3  
864 [43]:

865

$$866 \quad H(X_1, X_2, \dots, X_n) \leq nH(X_1) \Rightarrow \frac{1}{n} H(X_1, X_2, \dots, X_n) \leq H(X_1) \Rightarrow H(x) \leq H(X_1) \quad \text{Equation (4.3)}$$

867

868 The standardized MMS processes that we extract from the wearable sensors consist of non-zero values  
869 (“peaks” that are gamma distributed) and zero values (“*quiet moments*” at the person’s average level  
870 of activity) and can be treated as the product between two processes. A gamma distributed process  $X_G^t$   
871 and a binary process  $X_B^t$ , where  $t$  denotes discrete time. If for small time windows the process is roughly  
872 stationary, then at each point in time we have the processes  $X_G$  and  $X_B$ , respectively. Then, from  
873 Equation (4.3) we have the upper bound for the entropy rate expressed in Equation 4.4:

874

$$875 \quad H(X^t) \leq H(X_G X_B) \quad \text{Equation (4.4)}$$

876

877 If  $H(X_G, X_B)$  is the joint entropy, because  $f(x, y) = xy$  is a measurable function, we have Equation  
878 4.5 [43]:

879

$$880 \quad H(X_G X_B) \leq H(X_G, X_B) \quad \text{Equation (4.5)}$$

881

882 The upper bound for the joint entropy is expressed in Equation 4.6, [43]:

883

$$884 \quad H(X_G, X_B) \leq H(X_G) + H(X_B) \quad \text{Equation (4.6)}$$

885

886 Equality holds true if and only if  $X_G$  and  $X_B$  are independent. Ultimately, from Equations (4.4) - (4.6):

887

$$888 \quad H(X^t) \leq H(X_G) + H(X_B) \quad \text{Equation (4.7)}$$

889

890 In practice,  $X_G$  is a discrete approximation of a continuous gamma variable  $X_g$ . If  $\Delta$  is the size of the  
891 bin used in the approximation and  $h(X_g)$  the differential (continuous) entropy of  $X_g$ , it can be shown  
892 that [43]:

893

$$894 \quad h(X_g) = \lim_{\Delta \rightarrow 0} (H(X_G, \Delta) + \log \Delta) \quad \text{Equation (4.8)}$$

895

896 Therefore, for small  $\Delta$  we can write:

897

$$898 \quad h(X_g) \cong H(X_G, \Delta) + \log \Delta \quad \text{Equation (4.9)}$$

899

900 Equivalently:

901

$$902 \quad H(X_G) \cong h(X_g) - \log \Delta \quad \text{Equation (4.10)}$$

903

904 We mentioned earlier that the differential entropy of the gamma distribution (with shape  $k$  and scale  
905  $\theta$ ) has the closed form:

906

$$907 \quad h(X_g) = k + \ln\theta + \ln\Gamma(k) + (1 - k)\psi(k) \quad \text{Equation (4.11)}$$

908

909 where  $\Gamma(k)$  is the gamma function and  $\psi(k)$  is the digamma function.

910

911 Because of the power law between shape and scale that we discovered from analyzing human motion  
912 data:

913

$$914 \quad \log k \cong a \log \theta + b \quad \text{Equation (4.12)}$$

915

916 Where  $a \leq 0$  and  $b$  are parameters that are determined by fitting a regression model on the population  
917 of interest. Because of this, differential entropy ends up being a univariate function of  $\theta$ , for a specific  
918 set of parameters.

919

920 For the ranges of values typically found in the MMS, we see that Differential Entropy has almost a  
921 positive linear relationship with the natural logarithm of the scale, which is equivalent to the Noise-to-  
922 Signal Ratio of the gamma process. For greater values, that are not usually encountered in human data,  
923 the Differential entropy diverges. (Here the calculation of differential entropy for smaller values failed  
924 due to numerical instability). Figure 6A shows these results.

925

926 Because of Equation (4.10), we expect the empirical discrete entropy to also behave linearly with  
927 respect to the log-NSR, which turned out to be the case. For the range of physiological values, we  
928 found a slope of 0.4694 nats ( $p < 0.01$ ) for the differential entropy and a slope of 0.2606 nats ( $p < 0.01$ )  
929 for the empirical entropy.

930

931 Moving on to the process  $H(X_B)$ , the theoretical entropy (if probabilities do not change within a time  
932 window, *i.e.*, spike process is Bernoulli) is equal to [44]:

933

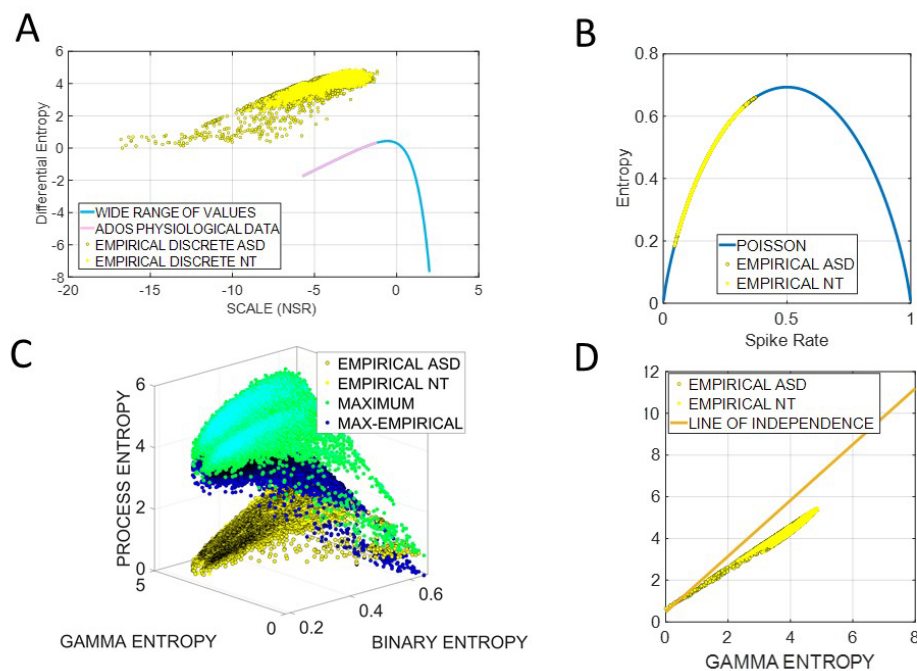

934

935 **Figure 6. Theoretical considerations of relationships between NSR and Entropy metrics. (A)**  
 936 **Near positive linear relationship between Differential Entropy and the natural logarithm of the**  
 937 **Gamma scale, the NSR of the gamma process. (B) The empirically estimated entropy is the same**  
 938 **as the equivalent Poisson process. Within the range of physiological data from the ADOS dyadic**  
 939 **interaction, the entropy of the gamma component increases with the NSR, and the entropy of the**  
 940 **binary component increases with the Spike Rate. (C) Sampling the empirical ranges across the**  
 941 **entropy of the gamma component and the entropy of the binary component of the MMS yields**  
 942 **the theoretical maximal entropy defining the upper bound (green). Their ratio (blue) indicates**  
 943 **that the maximum entropy is greater than the empirical entropy by a quantity that is increasing**  
 944 **as the binary entropy drops (*i.e.*, as the spike rate decreases) and it increases as the gamma**  
 945 **entropy increases. (D) The binary spike process has a relatively small dependence from the**  
 946 **gamma process, suggesting that in human motion timing and amplitude (spatial) aspects of these**  
 947 **motions are independent.**

948

$$949 \quad H(X_B) = -p \log p - (1 - p) \log(1 - p) \quad \text{Equation (4.13)}$$

950

951 Where  $p$  is the probability of a spike occurring. We approximate it in Equation 4.14 as:

952

$$953 \quad H(X_B) = -R \log R - (1 - R) \log(1 - R) \quad \text{Equation (4.14)}$$

954

955 Where  $R$  is the spike rate measured as “number of spikes” per “number of samples”.

956

957 As we see, the empirically estimated entropy is the same as the equivalent Poisson process. As a  
958 conclusion, for the range of physiological data from the ADOS dyadic interaction, the entropy of the  
959 gamma component is increasing with the NSR, and the entropy of the binary component is increasing  
960 with the Spike Rate.

961

## 962 **4.2 The Separability of Peak Activity from Standardized Angular Speed.**

963 If we plot the entropy of the process  $H(X_G X_B)$  and the maximum theoretical entropy defining the upper  
964 bound,  $H(X_G) + H(X_B)$ , we see that the maximum entropy is greater than the empirical entropy by a  
965 quantity that is increasing as the binary entropy drops, or equivalently (by the previous finding) as the  
966 spike rate decreases. It increases as the gamma entropy increases. Fitting a surface function, we find  
967 that:

968

$$969 \quad H_{max}(X_G, X_B) - H(X_G X_B) = -2.368H(X_B) + 0.8141H(X_G) + 1.114, \quad RMSE = 0.04857$$

970

971 Then, we get an approximate relation:

972

$$973 \quad H(X_G X_B) = 3.368H(X_B) + 0.1859H(X_G) - 1.114$$

974

975 Recall that the following inequality holds:

976

$$977 \quad H(X_G X_B) \leq H(X_G, X_B) \leq H(X_G) + H(X_B)$$

978

979 Which yields:

980

$$981 \quad 3.368H(X_B) + 0.1859H(X_G) - 1.114 \leq H(X_G, X_B) \leq H(X_G) + H(X_B)$$

982

983 Or:

984

$$985 \quad 3.368[H(X_B) + H(X_G)] - 3.1821H(X_G) - 1.114 \leq H(X_G, X_B) \leq H(X_G) + H(X_B)$$



986

987 Finally:

988

$$989 \quad 3.368H_{max}(X_G, X_B) - 3.1821H(X_G) - 1.114 \leq H(X_G, X_B) \leq H_{max}(X_G, X_B)$$

990

991 If  $X_G$  and  $X_B$  were to be independent, we can see that:

992

$$993 \quad 3.368H_{max}(X_G, X_B) - 3.1821H(X_G) - 1.114 = H_{max}(X_G, X_B)$$

994

$$995 \quad \text{Or:} \quad H_{max}(X_G, X_B) = 1.34H(X_G) + 0.47$$

996

997 This independence criterion, is obviously data dependent. In the general case where we can fit a surface  
998 of the form:

$$999 \quad H_{max}(X_G, X_B) - H(X_G, X_B) = aH(X_B) + bH(X_G) + c$$

1000 The condition for independence is:

$$1001 \quad H_{max}(X_G, X_B) = \left(1 - \frac{b}{a}\right)H(X_B) - \frac{c}{a}$$

1002 If the actual data can be well fit by a linear model with slope  $A$  and we ignore small differences between  
1003 the intercepts of the two linear models, an easy way to quantify departure from independence is by  
1004 computing the angle  $\theta$  between the two lines:

$$1005 \quad \theta = \tan^{-1} \frac{A - \frac{a-b}{a}}{1 + \frac{a-b}{a}A}$$

1006 Then, we define the degree of departure from independence as the ratio between the  $\theta$  and  $\frac{\pi}{2}$ . If the  
1007 data cannot be well fit by a linear model, it's best to perform a standard goodness-of-fit test and/or  
1008 measure the mean error between the model and the data. If  $\theta > 0$ , the rate of maximum joint entropy  
1009 increase over the gamma entropy is bigger than in the case of independence, if  $\theta < 0$  it's smaller.

1010 From our data, we see that this condition holds pretty well, with 9.93 % departure from independence  
1011 for the ASD group and 11.55 % for the NT group. This implies that:

1012

$$1013 \quad H(X_G, X_B) \cong H(X_G) + H(X_B) \quad \text{Equation (4.15)}$$

1014

1015 We just showed that the binary spike process is not very dependent from the gamma process. This  
1016 supports the independence of time and space in human motion, previously proposed for intentional,  
1017 goal-directed movements at a behavioral level of kinematic analyses [16; 45; 46; 47; 48] under a  
1018 geometric modeling approach to address the brain control and coordination of the bodily degrees of  
1019 freedom problem [49; 50].

1020

### 1021 **4.3 Controllability of an Agent in a Dyadic Social Interaction is Inversely Proportional to** 1022 **Autonomy: Leveraging Sociomotor Agency to Protect the Agent**

1023

1024 In the methods section we defined what Transfer Entropy  $T_{Y \rightarrow X}(k, l)$  between two processes X and Y  
1025 is:

1026

$$1027 \quad T_{Y \rightarrow X}(k, l) = E[t_{Y \rightarrow X}(n + 1, k, l)] \quad \text{Equation (4.16)}$$

1028

$$1029 \quad t_{Y \rightarrow X}(n + 1, k, l) = i(\mathbf{y}_n^{(l)}; x_{n+1} | \mathbf{x}_n^{(k)})$$

1030

1031 Equivalently, TE can be seen as the difference between the conditional entropy rate (which is equal to  
1032 entropy rate for stationary processes)  $h_X$  of process X and the generalized entropy rate  $h_{X,Y}$  of X  
1033 conditioning on the source Y [51]:

$$1034 \quad T_{Y \rightarrow X}(k, l) = h_X - h_{X,Y} \quad \text{Equation (4.17)}$$

1035

1036 With:

$$1037 \quad h_X = - \sum p(x_{n+1}, x_n^{(k)}) \log p(x_{n+1} | x_n^{(k)})$$

1038

1039

$$1040 \quad h_{X,Y} = - \sum p(x_{n+1}, x_n^{(k)}, y_n^{(l)}) \log p(x_{n+1} | x_n, y_n^{(l)})$$

1041

1042 The generalized entropy rate measures the uncertainty in predicting the future values of X, given its  
1043 history and the past values of Y. Transfer Entropy is the reduction in uncertainty of predicting the

1044 future of  $X$  when we consider the process  $Y$ . If we call  $h_{Y,X}$  uncertainty, then  $h_Y$  is what we already  
1045 defined as autonomy and  $T_{X \rightarrow Y}$  is the transfer entropy.

1046

1047 We chose embedded history of length 20 for TE and for the entropy rate of our processes we used a  
1048 template (embedding) length equal to the average distance between two spikes, to ensure that in the  
1049 reconstructed space, the coordinates of a point in time include both zeros (“quiet moments”) and spikes  
1050 and that the system doesn’t bounce back and forth from a single coordinate of zeros components. The  
1051 embedding delay was chosen using Average Mutual Information.

1052

1053 If we plot the Child or Clinician Autonomy with respect to the  $\log(\text{NSR})$  and the Spike Rate, we see  
1054 in Figure 7 that the relationship between entropy rate, noise and spike rate is rather complex. It also  
1055 differs between NT and ASD, more data are needed to get a clear picture but we can definitely see that  
1056 there is a small positive trend with respect to noise and spike rate. Nonetheless, this shows that the  
1057 processes cannot be treated as *i.i.d.*

1058

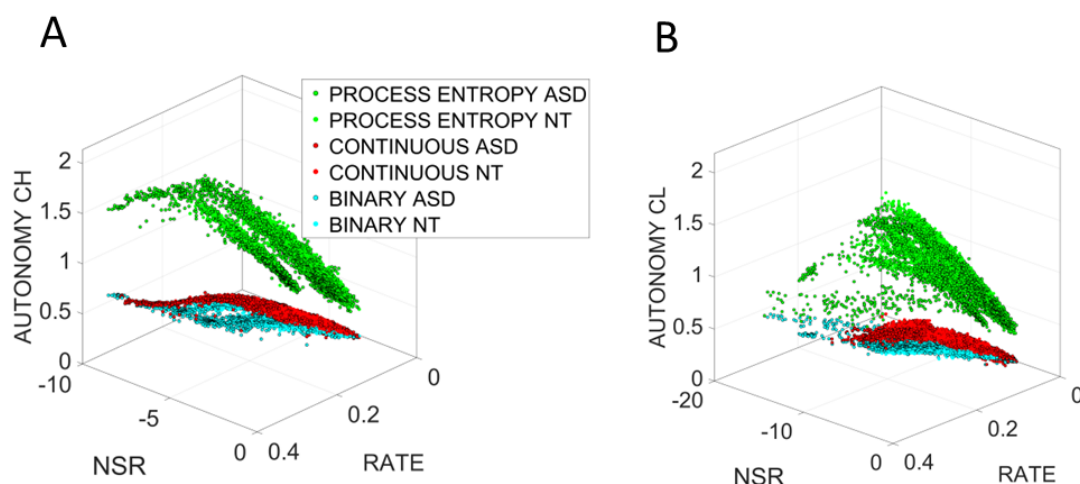

1059

1060 **Figure 7. Non *i.i.d.* process revealed by the relationship between autonomy, NSR and spike rate**  
1061 **for clinician (A) and child (B) for the gamma and binary components of the MMS, relative to the**  
1062 **process entropy.**

1063

1064 Now that we have established the speed/peak activity independence and the positive correlation  
1065 between entropy rate and NSR or Spike Rate, we are ready to study how TE behaves in the shared  
1066 space of the child-clinician dyad.

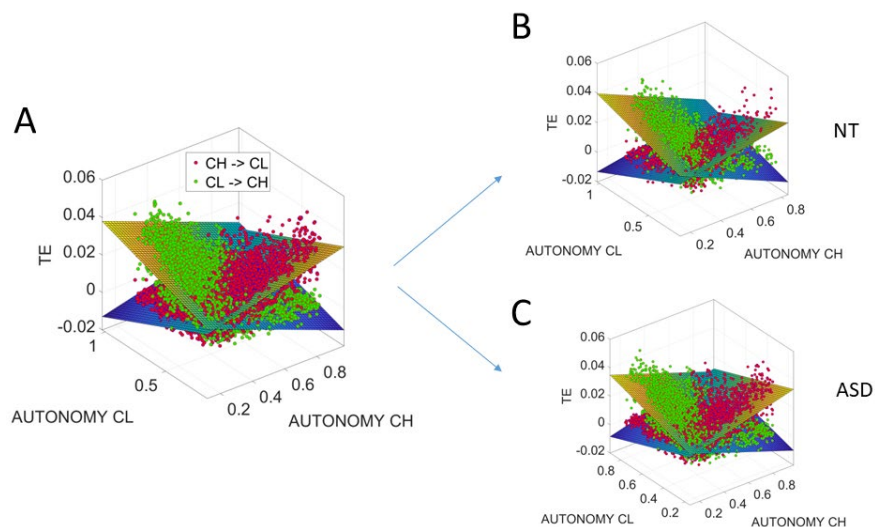

1067

1068 **Figure 8. Linear relationships between transfer entropy and the entropy rates (autonomies) for**  
1069 **child and clinician differentiating between NT and ASD participants.**

1070

1071 We find that  $TE_{CL \rightarrow CH}$  decreases when the child exhibits high autonomy and increases when the  
1072 clinician has higher autonomy and vice versa for  $TE_{CH \rightarrow CL}$ . In fact, this relationship is well  
1073 characterized by linear relationships between transfer entropy and the entropy rates (autonomies), as  
1074 the fitted linear surfaces indicate in Figure 8.

1075

1076 In this sense, we can safely conclude that by manipulating standardized human biorhythmic time series  
1077 either by increasing the NSR or by increasing peak activity, we can increase autonomy and reduce the  
1078 controllability of human agents by other human or by artificial agents, including those potentially  
1079 created by AI.

1080

#### 1081 **4.4 Validation of the Digitization of the ADOS: Automated, Streamlined and Scalable Screener** 1082 **of Socio-Motor Agency**

1083 To make our basic scientific results actionable, we need to validate our digital data with the clinical  
1084 criteria, a paradigm that we have coined *clinically interpretable digital biomarkers*. In this model, the  
1085 objective digital indexes that we used to define socio-motor agency as the autonomy-to-control ratio,  
1086 are examined in relation to the ADOS clinical scores that a trained human rated during the session. We  
1087 employ a machine learning technique, Support Vector Machine (SVM) to classify the digital data as a  
1088 function of the clinical score. Then we apply tools from signal detection theory, specifically the  
1089 receiving operating characteristic curve, ROC, to assess the validity of our classifier.

1090

1091 Each of 26 participants with the full ADOS session (digital and clinical) produces on average between  
1092 50 – 60 minutes of time series digital data from biosensors registering motion at 128Hz. We used the  
1093 left-hand wrist sensor in these analyses, as we showed that it is highly correlated with the right wrist,

1094 yet more variable, thus expanding our sampling space. Upon exploration of several time windows to  
1095 segment the data, sweeping across the time series and tasks, while maximizing statistical power in each  
1096 locally stationary segment, we arrived at 7.8 second windows as optimal.

1097

1098 The data were validated using the Leave-one-person-out cross-validation (LOOCV) method. As  
1099 features for our classifier, we used autonomy (entropy rate), NSR and the embedding delay of the data,  
1100 which is the time scale at which deterministic properties arise and characterize the dynamical behavior  
1101 of motion (for more information, see Methods). Two classifiers were used, one trained on female  
1102 subjects and the second one trained exclusively on male participants. When trying to digitally diagnose  
1103 autism in one participant, we trained our classifier on the data from the remaining male or female  
1104 participants and then tested how accurately the trained model predicts the participant class (NT vs.  
1105 ASD). This method avoids overfitting and trains models that can diagnose autism in novel participants,  
1106 thus automating the screening process. Digitizing the ADOS in this way makes the diagnosis of autism  
1107 more inclusive of females, historically underdiagnosed by a test that we objectively showed has biases  
1108 towards males across all tasks [10]. A larger sample size and a longitudinal study are required to  
1109 validate our model at scale. Yet, as shown in Figure 9A, there is no confusion of our biometrics about  
1110 the clinician ADOS scores, which classify ASD males with 100% accuracy and performs remarkably  
1111 well for ASD vs. NT females. Indeed, Figure 9B confirms the validity of these biometrics for clinical  
1112 use with an area under the ROC curve of 95.76%.

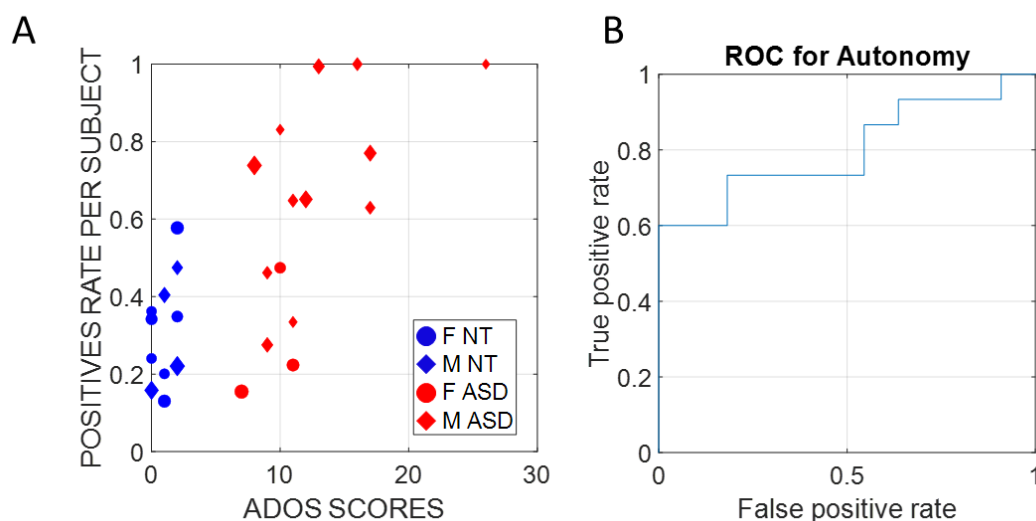

1113

1114 **Figure 9. (A) Support Vector Machines (SVM) classifiers were trained on all subjects except one**  
1115 **and tested on the remaining subjects of the same sex (Leave-one-person-out cross-validation**  
1116 **(LOOCV)). Therefore, each of the 26 subjects was digitally diagnosed with a classifier trained**  
1117 **on a different dataset, which ensured zero overfitting and bias. Training and testing features**  
1118 **were the entropy rate, the signal-to-noise ratio, and the embedding delay (the time scale at which**  
1119 **a dynamical system behaves in the most deterministic way) calculated on normalized speed**  
1120 **samples of ~7.8 secs duration windows. Here, we report the percentage of time windows per**  
1121 **subject that gave a positive diagnostic label and plot them versus the ADOS scores, as determined**  
1122 **by the clinicians. (B) We use the positive rate scores as a metric used to diagnose ASD and report**  
1123 **the Receiver Operating Characteristic curve (ROC curve), which shows the true positive and**

1124 **false positive rates of the digital diagnostic tool we developed for different thresholds. The Area**  
1125 **Under the Curve (AUC) is 0.9576, which indicates great performance.**

1126

## 1127 **5 Discussion**

1128 In this work, we use the ADOS test as a backdrop to study social interactions between children and  
1129 adult clinicians with the purpose of defining new ways to automate and speed up the autism screening  
1130 process, while leveraging the clinical validity of this test. To that end, we explored anew the concept  
1131 of socio-motor agency by defining a ratio of two indexes of autonomy and control. Autonomy was  
1132 defined as the non-parametric entropy rate spanning from totally random to totally deterministic  
1133 behavior of standardized micro-movements spike trains. These were derived from nuanced fluctuations  
1134 in motion data that contains goal-directed segments of behavior interspersed with spontaneously  
1135 occurring, more ambiguous, transient segments that are known to interconnect the goal-directed ones  
1136 [16; 52]. Control was defined in terms of the NSR, empirically estimated from such spike trains as  
1137 well, such that high regimes of NSR correspond to the memoryless regimes denoting high uncertainty  
1138 (poor predictability and randomness) in the motor code. We took a step further to examine the  
1139 parameterization of the MMS as a binary-spike and a Gamma process and demonstrated the  
1140 independence between them.

1141

1142 We reasoned that these binarized sequences of spikes bear a motor code whereby the observer may or  
1143 may not be able to predict and therefore control the observed agent. At high randomness, the observed  
1144 agent affords more autonomy than at deterministic ranges. At deterministic ranges, with high  
1145 regularity, the observer can predict and control the actions of the observed agent. At higher NSR, the  
1146 agent has lower self-control. This is so because the kinesthetic reafferent feedback from the motions is  
1147 noisy and with such poor signal quality it is difficult to predict a desired outcome and plan the action  
1148 consequences to compensate for sensory transduction, transmission, and motor integration delays  
1149 inherent in the person's system. As predicting his/her/their motor actions consequences can then be  
1150 compromised by noise in the motor code, the child is more controllable by the clinician. The observer  
1151 clinician can exert higher control over the observed agent. In this sense, the child's socio-motor agency  
1152 may also be compromised. This is the case whether the child / adult is autistic.

1153

1154 Underlying both indexes and the ratio of autonomy to control are then discrete pockets of information  
1155 making up a continuous stream of dyadic motor code, contributed by both social agents. Thus, we can  
1156 infer the existence of an underlying shared alphabet in the motor code that manifests during dyadic  
1157 social interactions of the type studied here. Agents with discrete motor signatures that appear more  
1158 random are thus harder to control and behave more autonomously and independently than agents with  
1159 systematically predictable motions sharing their codes.

1160

1161 Besides describing new biometrics of shared socio-motor agency in dyadic social interactions, our  
1162 analyses showed ways to streamline the ADOS test, thus making it less taxing on the child and the  
1163 clinician. A handful of tasks affording more socio-motor agency to the child can indeed uncover the  
1164 social readiness potential of the child rather than biasing the diagnosis by the clinician towards a deficit

1165 model. Along those lines, using these newly defined indexes of dyadic autonomy and control, we  
1166 demonstrated fundamental differences across the tasks for males and females, thus confirming that  
1167 despite previously quantified differences in motor control separating males and females at the  
1168 voluntary [4] and involuntary [12; 13] levels, the ADOS remains biased towards males. These digital  
1169 indexes of shared socio-motor agency, nevertheless, used within the context of an unbiased ML  
1170 classifier, could detect the differences between males and females for both the NT and ASD randomly  
1171 chosen participants. This digitized automated version of the test resembles the type of scenario that a  
1172 clinician faces at the clinic, any given day. Namely, a random arrival of a case that the clinician may  
1173 see for the first time. In that sense, the leave-one-person-out classifier provides robust digital screening  
1174 of autism and may be a way to scale our pilot study to encompass larger numbers of NT, ASD  
1175 participants across ages, sexes, and do so longitudinally as well.

1176

1177 Future longitudinal studies of autism with an eye for the evolution of the neuromotor code and its  
1178 impact on social perception and cognition, will require the type of normalization that we introduced  
1179 earlier with the MMS [3] and further used here, namely, scaling out allometric effects due to anatomical  
1180 differences across participants (see also [17; 18; 53; 54]). This step is crucial in any study that involves  
1181 biorhythmic motions whereby kinematic analyses will be impacted by such anatomical differences.  
1182 This is so because kinematic parameters such as speed, acceleration, distance, etc. are impacted by the  
1183 limb sizes and masses in ways that confound results and interpretation of such studies [55]. It will be  
1184 particularly important to consider these caveats present in all current studies that do not account for  
1185 allometric differences during the very early neurodevelopment when the rate of bodily growth is highly  
1186 non-linear and accelerated [54]. These rates of changes in anatomical growth produce different ranges  
1187 of values in such kinematic parameters and impact the empirical distributions of the values associated  
1188 with natural behaviors such as those examined here.

## 1189 **5.1 Implications of Socio-Motor Agency Metrics for AI and Privacy Protection**

1190 The theoretical considerations at the intersection of stochastic analyses and information theoretic  
1191 approaches with non-linear dynamics offers the MMS and analyses as a viable way to obtain the  
1192 personalized signatures of autonomy and control and tweak the NSR to mask the spike trains derived  
1193 from the person's physiological biorhythmic activity. This ability to separate the binary spike rate code  
1194 from the gamma process denoting levels of randomness vs. predictability, offers the possibility of  
1195 creating a device that alerts the persons involved in the dyadic exchange to balance their autonomy and  
1196 control, to attain socio-motor agency. By enhancing autonomy and avoiding excessive external control  
1197 by the other agent, be that agent another human or an AI-driven one, the person can be protected from  
1198 excess control. This approach will be critical to revamp autism therapies with an emphasis to respect  
1199 the child's autonomy and support the bottom-up development of autonomous motor control. The  
1200 maturation of bottom-up autonomous motor control (building blocks of autonomy) is a necessary pre-  
1201 requisite for the further neurodevelopment of top-down control. Without considering and balancing the  
1202 orderly maturation rates of these two building blocks of socio-motor behavior, therapies in autism will  
1203 cause trauma to the nervous system.

1204 We propose that this methodology can also be used to protect our privacy more generally from  
1205 surveillance systems, as ultimately these systems rely on biometric data, which we can now, using the  
1206 present personalized methods, manipulate to hide our fingerprint-like signatures from an external agent  
1207 trying to control us. This solution to the controllability issue can then be extended from individuals to  
1208 dyads, from dyads to social groups and from social groups to society. In this sense, socio-motor agency

1209 can serve as a foundation for societal agency, now quantifiable using the methods that we offer in this  
1210 work.

1211

## 1212 **6 Conclusions**

1213 In summary, we found that variability in the dyadic index of autonomy is more pronounced in ASD  
1214 than in NTs, across a broad range of ages from 4-15 years old. Furthermore, we found that the dyadic  
1215 NSR, indicative of socio-motor control, increases with age. This result is consistent with prior work on  
1216 individuals across ages and sex [3; 4]. In contrast, both ASD and NT showed increases of the autonomy  
1217 index with age, an indicator that regardless of the human condition, whether developing along a  
1218 neurotypical trajectory, or along the trajectory of autism spectrum disorders, respecting the child's  
1219 autonomy will be necessarily our best ally when designing future treatments that unveil the child social  
1220 readiness potential. We would not have known this had we treated the ADOS as the criterion test that  
1221 it is (*i.e.*, based off children with neurodevelopmental issues only), rather than treating it as a normative  
1222 test (*i.e.*, including NT controls as well, to define normative ranges and quantify similarities and  
1223 departures from it.)

1224 We have uncovered new indexes of shared, dyadic autonomy and control, objectively defined socio-  
1225 motor agency and provided new means to automate its digital screening with already routinely used  
1226 clinical tools. This work offers novel ways to scale our clinical science and make it actionable, diverse,  
1227 and inclusive at more than one level.

## 1228 **7 Conflict of Interest**

1229 *The authors declare that the research was conducted in the absence of any commercial or financial*  
1230 *relationships that could be construed as a potential conflict of interest.*

## 1231 **8 Author Contributions**

1232 TB and EBT contributed to conception and design of the analyses. TB analysed the data while EBT  
1233 designed the clinical study. RR organized and curated the database. TB wrote methods and derivations.  
1234 EBT wrote report. TB and EBR wrote and edited full manuscript. All authors contributed to manuscript  
1235 revision, read, and approved the submitted version.

## 1236 **9 Funding**

1237 This work was supported by the Nancy Lurie Marks Family Foundation Career Development Award  
1238 to EBT and by the New Jersey Governor's Council for Autism to EBT. TB and RR were funded by the  
1239 NJ GCA grant.

## 1240 **10 Acknowledgments and Disclaimer**

1241 We thank the children and families who kindly participated in the study. **This study was approved by**  
1242 **the Rutgers University IRB and signed consent was obtained from the legal guardian/parent of the child.**

1243

1244



## 1245 11 References

- 1246 [1] C. Lord, S. Risi, L. Lambrecht, E.H. Cook, Jr., B.L. Leventhal, P.C. DiLavore, A. Pickles, and M.  
1247 Rutter, The autism diagnostic observation schedule-generic: a standard measure of social and  
1248 communication deficits associated with the spectrum of autism. *J Autism Dev Disord* 30 (2000)  
1249 205-23.
- 1250 [2] K. Gotham, S. Risi, A. Pickles, and C. Lord, The Autism Diagnostic Observation Schedule: revised  
1251 algorithms for improved diagnostic validity. *J Autism Dev Disord* 37 (2007) 613-27.
- 1252 [3] E.B. Torres, M. Brincker, R.W. Isenhower, P. Yanovich, K.A. Stigler, J.I. Nurnberger, D.N.  
1253 Metaxas, and J.V. Jose, Autism: the micro-movement perspective. *Front Integr Neurosci* 7  
1254 (2013) 32.
- 1255 [4] E.B. Torres, R.W. Isenhower, P. Yanovich, G. Rehrig, K. Stigler, J. Nurnberger, and J.V. Jose,  
1256 Strategies to develop putative biomarkers to characterize the female phenotype with autism  
1257 spectrum disorders. *J Neurophysiol* 110 (2013) 1646-62.
- 1258 [5] A.M. D'Mello, I.R. Frosch, C.E. Li, A.L. Cardinaux, and J.D.E. Gabrieli, Exclusion of females in  
1259 autism research: Empirical evidence for a "leaky" recruitment-to-research pipeline. *Autism Res*  
1260 (2022).
- 1261 [6] S. Lundstrom, C. Marland, R. Kuja-Halkola, H. Anckarsater, P. Lichtenstein, C. Gillberg, and T.  
1262 Nilsson, Assessing autism in females: The importance of a sex-specific comparison. *Psychiatry*  
1263 *Res* 282 (2019) 112566.
- 1264 [7] R. Loomes, L. Hull, and W.P.L. Mandy, What Is the Male-to-Female Ratio in Autism Spectrum  
1265 Disorder? A Systematic Review and Meta-Analysis. *J Am Acad Child Adolesc Psychiatry* 56  
1266 (2017) 466-474.
- 1267 [8] E. Somoza, and D. Mossman, ROC curves and the binormal assumption. *J Neuropsychiatry Clin*  
1268 *Neurosci* 3 (1991) 436-9.
- 1269 [9] M. Hollander, and E.A. Pena, Nonparametric Methods in Reliability. *Stat Sci* 19 (2004) 644-651.
- 1270 [10] E.B. Torres, R. Rai, S. Mistry, and B. Gupta, Hidden Aspects of the Research ADOS Are Bound  
1271 to Affect Autism Science. *Neural Comput* 32 (2020) 515-561.
- 1272 [11] H. Bokadia, R. Rai, and E.B. Torres, Digitized Autism Observation Diagnostic Schedule: Social  
1273 Interactions beyond the Limits of the Naked Eye. *J Pers Med* 10 (2020).
- 1274 [12] E.B. Torres, and K. Denisova, Motor noise is rich signal in autism research and pharmacological  
1275 treatments. *Sci Rep* 6 (2016) 37422.
- 1276 [13] E.B. Torres, S. Mistry, C. Caballero, and C.P. Whyatt, Stochastic Signatures of Involuntary Head  
1277 Micro-movements Can Be Used to Classify Females of ABIDE into Different Subtypes of  
1278 Neurodevelopmental Disorders. *Front Integr Neurosci* 11 (2017) 10.
- 1279 [14] M. Brincker, and E.B. Torres, Noise from the periphery in autism. *Front Integr Neurosci* 7 (2013)  
1280 34.
- 1281 [15] E.B. Torres, H. Varkey, J. Vero, E. London, H. Phan, P. Kittler, A. Gordon, R.E. Delgado, C.F.  
1282 Delgado, and E.A. Simpson, Sensing echoes: temporal misalignment in auditory brainstem  
1283 responses as the earliest marker of neurodevelopmental derailment. *PNAS nexus* 2 (2023)  
1284 pgac315.
- 1285 [16] E.B. Torres, Two classes of movements in motor control. *Exp Brain Res* 215 (2011) 269-83.
- 1286 [17] E.B. Torres, R.W. Isenhower, J. Nguyen, C. Whyatt, J.I. Nurnberger, J.V. Jose, S.M. Silverstein,  
1287 T.V. Papatomas, J. Sage, and J. Cole, Toward Precision Psychiatry: Statistical Platform for  
1288 the Personalized Characterization of Natural Behaviors. *Front Neurol* 7 (2016) 8.
- 1289 [18] E.B. Torres, C. Caballero, and S. Mistry, Aging with Autism Departs Greatly from Typical Aging.  
1290 *Sensors (Basel)* 20 (2020).

- 1291 [19] C.E. Shannon, and W. Weaver, The mathematical theory of communication, University of Illinois  
1292 Press, Urbana, 1998.
- 1293 [20] C.E. Shannon, Claude Elwood Shannon papers, 1932-1995 (bulk 1938-1989), pp. 7,000.
- 1294 [21] C.E. Shannon, N.J.A. Sloane, and A.D. Wyner, Claude Elwood Shannon : miscellaneous writings,  
1295 Mathematical Sciences Research Center, AT&T Bell Laboratories, Murray Hill, N.J., 1993.
- 1296 [22] C.E. Shannon, N.J.A. Sloane, A.D. Wyner, and IEEE Information Theory Society., Claude  
1297 Elwood Shannon : collected papers, IEEE Press, New York, 1993.
- 1298 [23] J. Shi, L. Chen, and K. Aihara, Embedding entropy: a nonlinear measure of dynamical causality.  
1299 J R Soc Interface 19 (2022) 20210766.
- 1300 [24] E. Tan, S. Algar, D. Correa, M. Small, T. Stemler, and D. Walker, Selecting embedding delays:  
1301 An overview of embedding techniques and a new method using persistent homology. Chaos 33  
1302 (2023) 032101.
- 1303 [25] F. Takens, Detecting strange attractors in turbulence. in: D.A.R.a.L.-S. Young, (Ed.), Dynamical  
1304 Systems and Turbulence, Lecture Notes in Mathematics, Springer-Verlag, 1981, pp. 366–381.
- 1305 [26] A. Delgado-Bonal, and A. Marshak, Approximate Entropy and Sample Entropy: A  
1306 Comprehensive Tutorial. Entropy (Basel) 21 (2019).
- 1307 [27] J.T. Lizier, JIDT: an information-theoretic toolkit for studying the dynamics of complex systems.  
1308 Frontiers in Robotics and AI 1 (2014) 1-20.
- 1309 [28] N.H. Packard, J.P. Crutchfield, J.D. Farmer, and R.S. Shaw, Geometry from a time series. Physical  
1310 Review Letters 45 (1980) 712-716.
- 1311 [29] A. Delgado-Bonal, and A. Marshak, Approximate entropy and sample entropy: A comprehensive  
1312 tutorial. Entropy 21 (2019) 541.
- 1313 [30] P. Grassberger, and I. Procaccia, Estimation of the Kolmogorov entropy from a chaotic signal.  
1314 Physical review A 28 (1983) 2591.
- 1315 [31] J.-P. Eckmann, and D. Ruelle, Ergodic theory of chaos and strange attractors. Reviews of modern  
1316 physics 57 (1985) 617.
- 1317 [32] C. Rhodes, and M. Morari, The false nearest neighbors algorithm: An overview. Computers &  
1318 Chemical Engineering 21 (1997) S1149-S1154.
- 1319 [33] J.T. Lizier, JIDT: An information-theoretic toolkit for studying the dynamics of complex systems.  
1320 Frontiers in Robotics and AI 1 (2014) 11.
- 1321 [34] R.M. Fano, and D. Hawkins, Transmission of information: A statistical theory of communications.  
1322 American Journal of Physics 29 (1961) 793-794.
- 1323 [35] J.T. Lizier, M. Prokopenko, and A.Y. Zomaya, Local information transfer as a spatiotemporal  
1324 filter for complex systems. Physical Review E 77 (2008) 026110.
- 1325 [36] M. Wibral, R. Vicente, and J.T. Lizier, Directed information measures in neuroscience, Springer,  
1326 2014.
- 1327 [37] S.M. Pincus, and A.L. Goldberger, Physiological time-series analysis: what does regularity  
1328 quantify? American Journal of Physiology-Heart and Circulatory Physiology 266 (1994)  
1329 H1643-H1656.
- 1330 [38] A.V. Lazo, and P. Rathie, On the entropy of continuous probability distributions (corresp.). IEEE  
1331 Transactions on Information Theory 24 (1978) 120-122.
- 1332 [39] E.B. Torres, Atypical signatures of motor variability found in an individual with ASD. Neurocase  
1333 19 (2013) 150-65.
- 1334 [40] E.B. Torres, Atypical signatures of motor variability found in an individual with ASD. Neurocase  
1335 19 (2011) 150-65.
- 1336 [41] M. Brincker, and E.B. Torres, Chapter 1- Why Study Movement Variability in Autism\_. in: E.B.  
1337 Torres, and C. Whyatt, (Eds.), Autism : the movement sensing perspective, CRC Press/Taylor  
1338 & Francis Group, Boca Raton, 2018, pp. xviii, 386 pages.

- 1339 [42] S.N. Mohamed Thangal, and J.M. Donelan, Scaling of inertial delays in terrestrial mammals. *PLoS*  
1340 *One* 15 (2020) e0217188.
- 1341 [43] T.M. Cover, *Elements of information theory*, John Wiley & Sons, 1999.
- 1342 [44] A. Klenke, and A. Klenke, *The Poisson point process. Probability Theory: A Comprehensive*  
1343 *Course* (2014) 543-561.
- 1344 [45] E.B. Torres, New symmetry of intended curved reaches. *Behav Brain Funct* 6 (2010) 21.
- 1345 [46] E. Torres, and R. Andersen, Space-time separation during obstacle-avoidance learning in  
1346 monkeys. *J Neurophysiol* 96 (2006) 2613-32.
- 1347 [47] E.B. Torres, Zipser D., Simultaneous control of hand displacements and rotations in orientation-  
1348 matching experiments. *Journal of Applied Physiology* 96 (2004) 1978-1987.
- 1349 [48] E.B. Torres, R. Quian Quiroga, H. Cui, and C.A. Buneo, Neural correlates of learning and  
1350 trajectory planning in the posterior parietal cortex. *Front Integr Neurosci* 7 (2013) 39.
- 1351 [49] E.B. Torres, Zipser, D., Reaching to Grasp with a Multi-jointed Arm (I): A Computational Model.  
1352 *Journal of Neurophysiology* 88 (2002) 1-13.
- 1353 [50] E.B. Torres, *Theoretical Framework for the Study of Sensori-motor Integration.*, Cognitive  
1354 *Science*, University of California, San Diego, La Jolla, 2001, pp. 115.
- 1355 [51] M. Prokopenko, J.T. Lizier, and D.C. Price, On thermodynamic interpretation of transfer entropy.  
1356 *Entropy* 15 (2013) 524-543.
- 1357 [52] E.B. Torres, Signatures of movement variability anticipate hand speed according to levels of  
1358 intent. *Behav Brain Funct* 9 (2013) 10.
- 1359 [53] C. Caballero, S. Mistry, and E.B. Torres, Age-Dependent Statistical Changes of Involuntary Head  
1360 Motion Signatures Across Autism and Controls of the ABIDE Repository. *Front. Integr.*  
1361 *Neurosci.* 14 (2020) 1-14.
- 1362 [54] E.B. Torres, B. Smith, S. Mistry, M. Brincker, and C. Whyatt, Neonatal Diagnostics: Toward  
1363 Dynamic Growth Charts of Neuromotor Control. *Front Pediatr* 4 (2016) 121.
- 1364 [55] E.B. Torres, J. Vero, and R. Rai, Statistical Platform for Individualized Behavioral Analyses Using  
1365 Biophysical Micro-Movement Spikes. *Sensors (Basel)* 18 (2018).

1366

## 1367 **12 Data Availability Statement**

1368 The datasets [GENERATED/ANALYZED] for this study can be found in the repository  
1369 <https://zenodo.org/records/10032169>. Please see the “Availability of data” section of [Materials and](#)  
1370 [data policies in the Author guidelines](#) for more details.

1371

1372

1373
